# Supplementary material for: Exploring the excited-state charge transfer fluorescence profile of 7-hydroxycoumarin and 2-methylimidazole – a combined X-ray diffraction and theoretical approach
Source: Royal Society of Chemistry journal article supplement (doi:10.1039/d2cp01235a), 2022-01-01
Supplement: d2cp01235a1.pdf [file d2cp01235a1.pdf]

# Exploring The Excited-State Charge Transfer Fluorescence Profile of 7- Hydroxycoumarin and 2- Methylimidazole- A Combined X-Ray Diffraction and Theoretical Approach.

Bryson A. Hawkins,<sup>1\*</sup> Elias Najib,<sup>1</sup> Jonathan J. Du,<sup>2</sup> Felcia Lai,<sup>1</sup> Jamie Platts,<sup>3</sup> Paul W. Groundwater,<sup>1</sup> and David E. Hibbs.<sup>1</sup>

<sup>1</sup>*Sydney School of Pharmacy, Faculty of Medicine and Health, The University of Sydney, NSW 2006 Australia*

<sup>2</sup>*Department of Biochemistry, School of Medicine, Emory University, Atlanta, Georgia, USA.*

<sup>3</sup>*School of Chemistry, Cardiff University, Cardiff, CF10 3AT, UK*

*\*Corresponding author: Bryson A. Hawkins, [bryson.hawkins@sydney.edu.au](mailto:bryson.hawkins@sydney.edu.au)*

*†Electronic supplementary information (ESI) available. CCDC: 2155506, 2155508 and 2155507 for (1), (2) and (3) For ESI and crystallographic data in CIF or other electronic formats, see DOI: XXXXXXXX*

Characterization of (1)

Diethylmalonate (3.15 g, 19.7 mmol) was added to a solution of 2,4-dihydroxybenzaldehyde (3 g, 21.6 mmol) in methanol (20 mL), followed by morpholine (163  $\mu$ L, 1.87 mmol) and acetic acid (52  $\mu$ L, 0.90 mmol) in methanol (1 mL). The reaction mixture was then refluxed, and, after completion by TLC, the mixture was allowed to cool to room temperature (25°C). The resulting solid was filtered, washed with methanol, and then recrystallised from methanol to give the final product as off-white solid plates (1.2 g, 24 %).

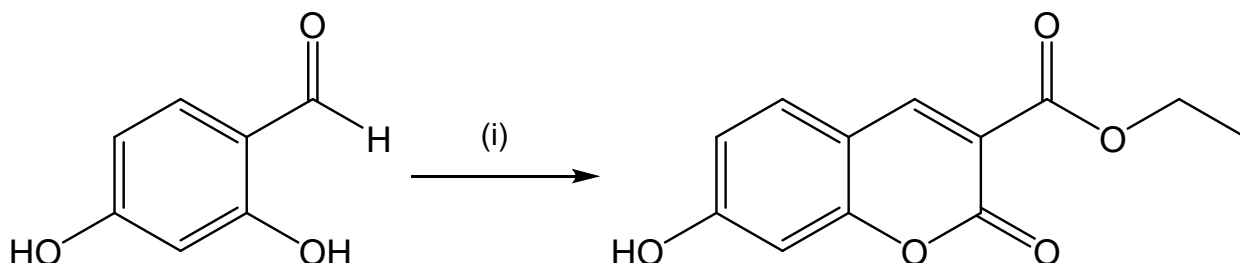

**Scheme 1.** Synthesis of ethyl 7-hydroxy-2-oxo-2H-chromene-3-carboxylate (**1**) via the Knoevenagel condensation of 2,4-dihydroxybenzaldehyde. Reaction conditions: (i) diethyl malonate, morpholine/acetic acid, MeOH, 85 °C, 3 h.

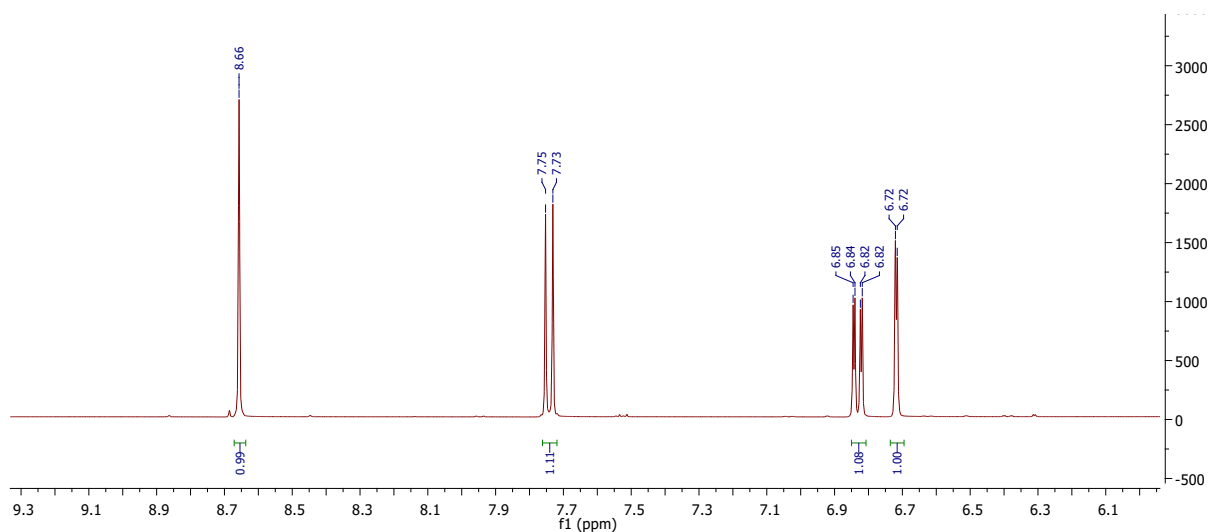

Figure S1.  $^1\text{H}$  NMR spectrum of (**1**)

$^1\text{H}$  NMR (400 MHz,  $\text{DMSO-}d_6$ )  $\delta_{\text{H}}$  1.29 (3H, t,  $J = 7.1$  Hz,  $\text{CH}_2\text{CH}_3$ ), 4.25 (2H, q,  $J = 7.1$  Hz,  $\text{CH}_2\text{CH}_3$ ), 6.72 (1H, d,  $J = 2.1$  Hz, H-8), 6.83 (1H, dd,  $J = 8.6$  Hz and 2.2 Hz, H-6), 7.74 (1H, d,  $J = 8.6$  Hz, H-5), 8.66 (1H, s, H-4);  $^{13}\text{C}$  NMR (100 MHz,  $\text{DMSO-}d_6$ )  $\delta_{\text{C}}$  14.15 ( $\text{CH}_3$ ), 60.8 ( $\text{CH}_2$ ), 101.8 (CH, C-8), 110.4 (quat, C-4a), 112.05 (quat, C-3), 114.05 (CH, C-6), 132.1 (CH, C-5), 149.4 (CH, C-4), 156.4 (C=O, C-2), 157.1 (quat, C-8a), 163.0 (ester C=O), 164.1 (quat, C-7); FTIR (neat,  $\nu_{\text{max}}/\text{cm}^{-1}$ ) 3545 (OH), 1734 (C=O), 1603 (C=C), 1225 (C-O); ESI-MS  $m/z$  257 ( $\text{MNa}$ ) $^+$ .

## Crystallographic Details

### Collection, Data reduction and refinement

The X-Ray diffraction experiments were performed at the Sydney School of Pharmacy, Faculty of Medicine and Health, University of Sydney, NSW, Australia. The diffractions were performed on an Agilent SuperNova™ Dual Source System with a CCD Atlas detector. For (1), (2) and (3) a crystal sized 0.14 x 0.15 x 0.55 mm, 0.3 x 0.2 x 0.6 mm and 0.6 x 0.3 x 0.16 mm, respectively, were mounted on a thin glass fibre with multipurpose Paratone-N, acting as a cryoprotectant and adhesive throughout the collection. Data was collected using a  $1^\circ$   $\omega$ -scans with the detector distance fixed at 5in all data collections. The reciprocal space was covered by positioning the detector arm between  $3.0(0)$  and  $40.2(0)^\circ$ ,  $3.2(0)$  and  $45.2(0)^\circ$ , and  $2.5(0)$  and  $65.9(0)^\circ$  in  $2^\theta$  for (1), (2) and (3), respectively. A total of 12124, 13019 and 58735 reflections were collected for (1), (2) and (3), respectively.

After collection, the data was sorted, scaled and merged using SORTAV by Blessing.<sup>1</sup> The final completenesses for (1), (2) and (3) were, 100%, 100% and 99.9%, respectively. The structures of (1), (2) and (3) were solved using direct methods (SHELXT), and a full-matrix least-squares refinement based on  $F^2$  was performed using SHELXL-2015.<sup>2</sup> To confirm the reflection data for all systems was modelled appropriately *via* the independent atomic model, the residual densities were review to confirm each system had a gaussian distribution. The gaussian distribution infers that the model has accurately modelled the data collect, these models can be seen below Figure S2.

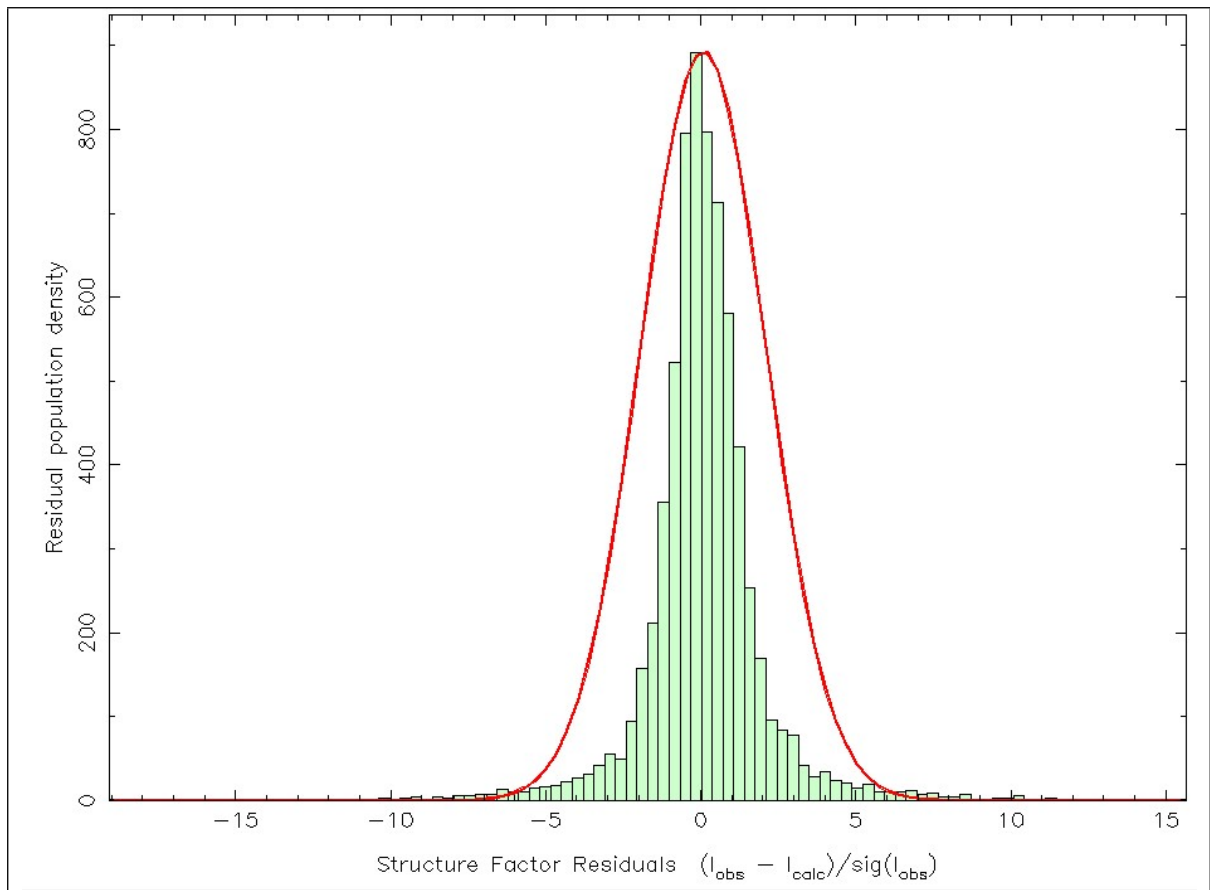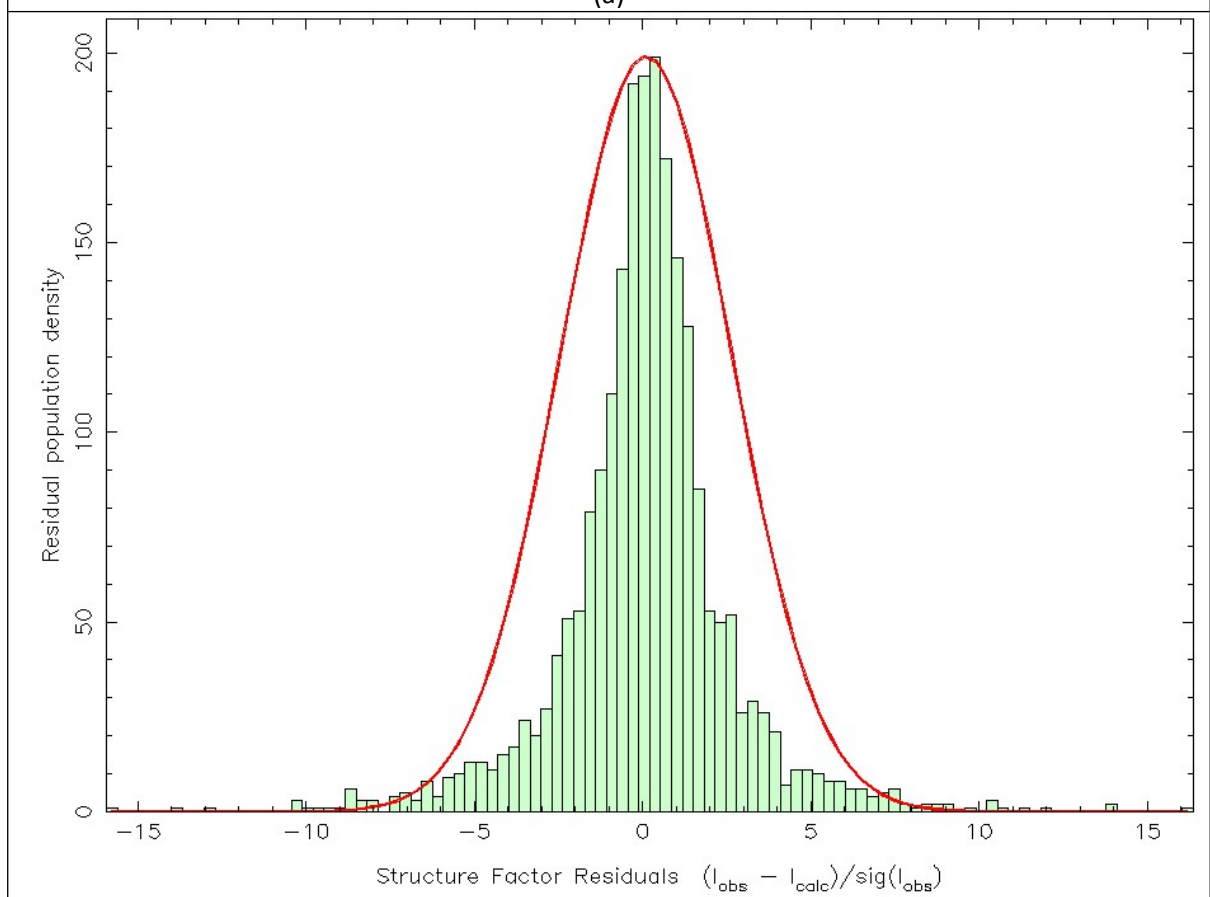

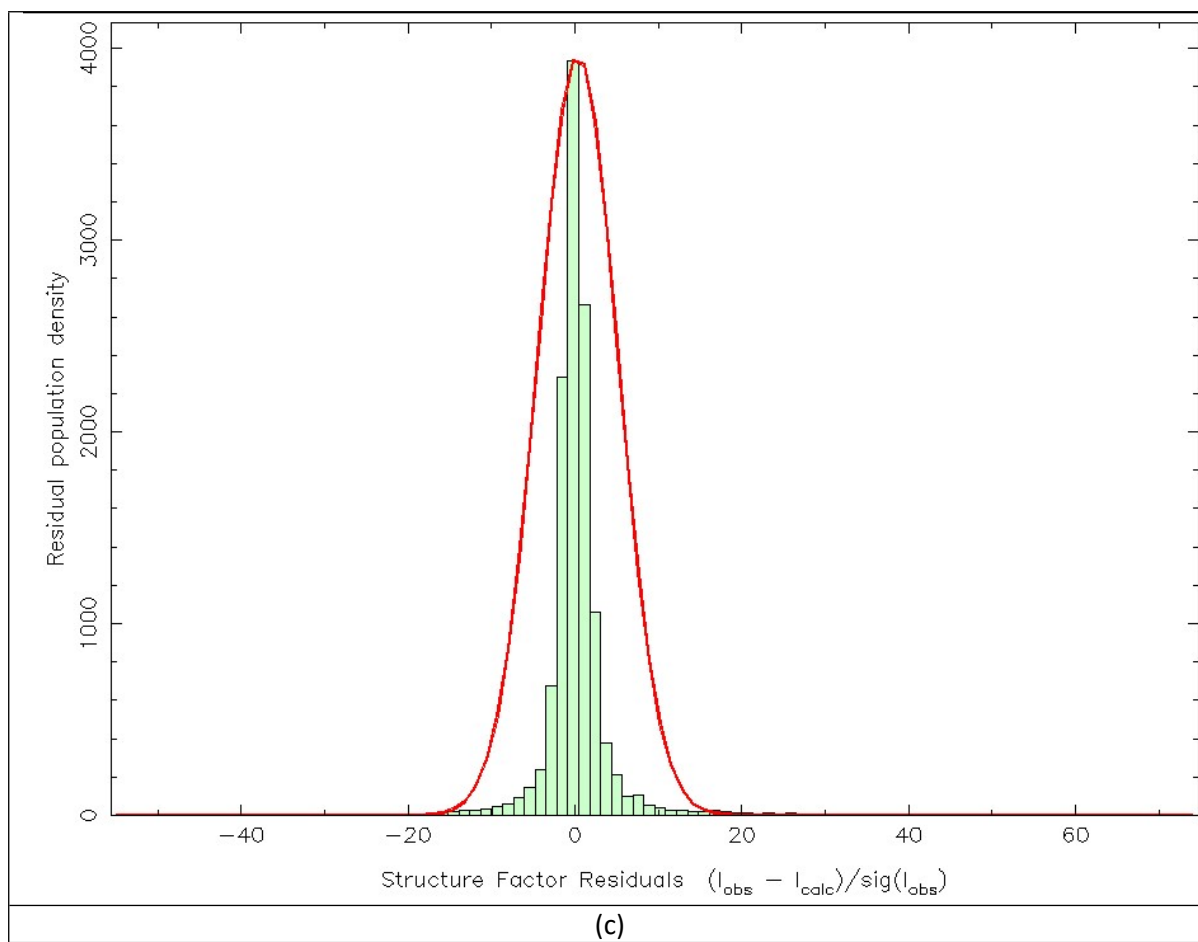

Figure S2. Residual density plots generated in WingX, residual density vs. fractal dimension a, b and c are (1), (2) and (3) respectively. <sup>3,4</sup>

Table S.1

Fractional Atomic Coordinates ( $\times 10^4$ ) and Equivalent Isotropic Displacement Parameters ( $\text{\AA}^2 \times 10^3$ ) for (1).  $U_{eq}$  is defined as 1/3 of the trace of the orthogonalised UIJ tensor.

| Atom | x          | y          | z         | $U_{eq}$  |
|------|------------|------------|-----------|-----------|
| O4   | 8243.1(10) | 2922.6(11) | 5282.3(6) | 17.38(17) |
| O1   | 4370.7(11) | 1894.6(11) | 8104.7(6) | 17.63(18) |
| O2   | 7696.6(11) | 3286.4(12) | 8687.7(6) | 20.81(19) |
| O5   | 4914.3(13) | 3031.4(13) | 1767.4(6) | 24.4(2)   |
| O3   | 9962.7(11) | 3076.5(13) | 6903.9(6) | 23.3(2)   |
| O1'  | 8435.6(13) | 3963.8(13) | 1091.4(7) | 25.9(2)   |
| C7   | 4546.2(15) | 2406.1(14) | 4934.3(8) | 14.6(2)   |
| C8   | 4515.4(15) | 2338.8(14) | 6056.1(8) | 14.6(2)   |
| C3   | 6242.4(15) | 2636.9(14) | 7949.1(8) | 14.8(2)   |

|     |            |            |           |         |
|-----|------------|------------|-----------|---------|
| C9  | 6662.7(16) | 2958.6(15) | 3524.0(8) | 17.1(2) |
| C4  | 6289.6(15) | 2591.4(14) | 6764.5(8) | 14.6(2) |
| C11 | 2925.9(16) | 2383.4(16) | 3113.7(9) | 19.3(2) |
| C6  | 6458.8(14) | 2751.0(14) | 4579.4(8) | 14.8(2) |
| C5  | 8276.3(15) | 2882.9(15) | 6382.0(8) | 16.1(2) |
| C12 | 2762.5(15) | 2211.6(15) | 4170.9(8) | 17.4(2) |
| C10 | 4875.9(16) | 2787.1(15) | 2793.7(8) | 17.8(2) |
| C2  | 4080.4(16) | 1981.9(16) | 9245.3(8) | 17.7(2) |
| C1  | 1899.0(17) | 1024.2(18) | 9227.8(9) | 23.0(2) |

Table S.2: Anisotropic Displacement Parameters ( $\text{\AA}^2 \times 10^3$ ) for (1) The Anisotropic displacement factor exponent takes the form:  $-2\pi^2[h^2a^*2U_{11}+2hka^*b^*U_{12}+\dots]$ .

| Atom | U11     | U22     | U33     | U23    | U13    | U12     |
|------|---------|---------|---------|--------|--------|---------|
| O4   | 11.3(3) | 27.6(4) | 13.9(3) | 6.3(3) | 2.6(3) | 3.6(3)  |
| O1   | 14.2(3) | 24.8(4) | 13.3(3) | 5.7(3) | 3.4(3) | -0.7(3) |
| O2   | 14.9(4) | 31.0(4) | 15.1(3) | 6.3(3) | 0.7(3) | 0.4(3)  |
| O5   | 22.5(4) | 39.4(5) | 13.1(4) | 9.5(3) | 3.6(3) | 6.4(3)  |
| O3   | 12.0(3) | 39.8(5) | 18.0(4) | 8.0(3) | 1.7(3) | 3.7(3)  |
| O1'  | 26.2(4) | 29.1(4) | 18.1(4) | 4.4(3) | 2.9(3) | -5.0(3) |
| C7   | 13.3(5) | 16.5(5) | 13.7(4) | 3.0(3) | 2.6(3) | 3.3(3)  |
| C8   | 12.1(4) | 16.7(4) | 15.3(4) | 3.7(3) | 4.0(3) | 2.6(3)  |
| C3   | 13.3(4) | 16.9(4) | 15.2(4) | 5.0(3) | 3.4(3) | 3.6(4)  |
| C9   | 15.4(5) | 21.3(5) | 15.0(4) | 4.2(4) | 4.5(4) | 3.7(4)  |
| C4   | 13.0(4) | 17.3(4) | 13.4(4) | 3.8(3) | 2.9(3) | 2.2(4)  |
| C11  | 16.1(5) | 25.1(5) | 16.0(5) | 4.0(4) | 0.3(4) | 4.8(4)  |
| C6   | 12.5(4) | 17.2(4) | 14.3(4) | 2.9(3) | 1.9(3) | 3.2(4)  |
| C5   | 14.6(4) | 20.4(5) | 13.6(4) | 4.3(3) | 3.3(3) | 2.8(4)  |
| C12  | 13.0(5) | 22.0(5) | 17.0(5) | 4.0(4) | 2.7(4) | 3.6(4)  |
| C10  | 20.6(5) | 20.4(5) | 12.6(4) | 3.4(3) | 3.2(4) | 5.5(4)  |
| C2   | 17.8(5) | 22.6(5) | 13.1(4) | 6.1(4) | 4.4(3) | 0.9(4)  |
| C1   | 18.5(5) | 28.1(6) | 23.2(5) | 9.4(4) | 6.2(4) | 0.5(4)  |

Table S.3 Bond Lengths for (1).

| Atom | Atom | Length/Å   | Atom | Atom | Length/Å   |
|------|------|------------|------|------|------------|
| O4   | C6   | 1.3725(12) | C7   | C12  | 1.4107(13) |
| O4   | C5   | 1.3872(11) | C8   | C4   | 1.3608(13) |
| O1   | C3   | 1.3290(12) | C3   | C4   | 1.4857(13) |
| O1   | C2   | 1.4555(11) | C9   | C6   | 1.3874(13) |
| O2   | C3   | 1.2162(12) | C9   | C10  | 1.3923(14) |
| O5   | C10  | 1.3440(12) | C4   | C5   | 1.4560(13) |
| O3   | C5   | 1.2082(12) | C11  | C12  | 1.3771(14) |
| C7   | C8   | 1.4245(13) | C11  | C10  | 1.4067(15) |
| C7   | C6   | 1.3983(13) | C2   | C1   | 1.5008(14) |

Table S.4 Bond Angles for (1)

| Atom | Atom | Atom | Angle/°   | Atom | Atom | Atom | Angle/°    |
|------|------|------|-----------|------|------|------|------------|
| C6   | O4   | C5   | 122.99(8) | C12  | C11  | C10  | 120.15(9)  |
| C3   | O1   | C2   | 116.24(8) | O4   | C6   | C7   | 120.53(8)  |
| C6   | C7   | C8   | 118.06(9) | O4   | C6   | C9   | 116.81(8)  |
| C6   | C7   | C12  | 118.08(9) | C9   | C6   | C7   | 122.65(9)  |
| C12  | C7   | C8   | 123.83(9) | O4   | C5   | C4   | 116.53(8)  |
| C4   | C8   | C7   | 121.26(9) | O3   | C5   | O4   | 115.58(9)  |
| O1   | C3   | C4   | 110.77(8) | O3   | C5   | C4   | 127.88(9)  |
| O2   | C3   | O1   | 123.92(9) | C11  | C12  | C7   | 120.30(9)  |
| O2   | C3   | C4   | 125.30(9) | O5   | C10  | C9   | 122.42(10) |
| C6   | C9   | C10  | 117.97(9) | O5   | C10  | C11  | 116.74(9)  |
| C8   | C4   | C3   | 120.77(9) | C9   | C10  | C11  | 120.82(9)  |
| C8   | C4   | C5   | 120.51(9) | O1   | C2   | C1   | 107.39(8)  |
| C5   | C4   | C3   | 118.69(8) |      |      |      |            |

Table S.5 Torsion Angles for (1)

| A  | B  | C  | D  | Angle/°     | A  | B  | C   | D   | Angle/°   |
|----|----|----|----|-------------|----|----|-----|-----|-----------|
| O1 | C3 | C4 | C8 | 16.72(13)   | C6 | C7 | C8  | C4  | -0.34(15) |
| O1 | C3 | C4 | C5 | -165.14(9)  | C6 | C7 | C12 | C11 | -0.76(15) |
| O2 | C3 | C4 | C8 | -162.26(10) | C6 | C9 | C10 | O5  | 177.67(9) |
| O2 | C3 | C4 | C5 | 15.88(15)   | C6 | C9 | C10 | C11 | -1.03(16) |

|    |    |     |     |             |     |     |     |    |            |
|----|----|-----|-----|-------------|-----|-----|-----|----|------------|
| C7 | C8 | C4  | C3  | 176.33(8)   | C5  | O4  | C6  | C7 | -3.82(15)  |
| C7 | C8 | C4  | C5  | -1.77(15)   | C5  | O4  | C6  | C9 | 175.45(9)  |
| C8 | C7 | C6  | O4  | 3.09(14)    | C12 | C7  | C8  | C4 | -178.11(9) |
| C8 | C7 | C6  | C9  | -176.14(9)  | C12 | C7  | C6  | O4 | -179.01(8) |
| C8 | C7 | C12 | C11 | 177.01(9)   | C12 | C7  | C6  | C9 | 1.76(15)   |
| C8 | C4 | C5  | O4  | 1.16(14)    | C12 | C11 | C10 | O5 | -176.77(9) |
| C8 | C4 | C5  | O3  | -178.03(10) | C12 | C11 | C10 | C9 | 1.99(16)   |
| C3 | O1 | C2  | C1  | -178.46(9)  | C10 | C9  | C6  | O4 | 179.88(9)  |
| C3 | C4 | C5  | O4  | -176.98(8)  | C10 | C9  | C6  | C7 | -0.87(16)  |
| C3 | C4 | C5  | O3  | 3.83(16)    | C10 | C11 | C12 | C7 | -1.06(16)  |
| C6 | O4 | C5  | O3  | -179.07(9)  | C2  | O1  | C3  | O2 | 3.21(14)   |
| C6 | O4 | C5  | C4  | 1.64(14)    | C2  | O1  | C3  | C4 | -175.79(8) |

Table S.6 Hydrogen Atom Coordinates ( $\text{\AA}\times 10^4$ ) and Isotropic Displacement Parameters ( $\text{\AA}^2\times 10^3$ ) for (1).

| Atom | x        | y        | z         | U(eq) |
|------|----------|----------|-----------|-------|
| H1A  | 920(30)  | 1630(30) | 8841(14)  | 39(4) |
| H1B  | 1610(20) | 1180(20) | 10009(13) | 34(4) |
| H1C  | 1670(20) | -400(20) | 8861(12)  | 24(3) |
| H1'A | 8300(30) | 3810(30) | 400(17)   | 47(5) |
| H1'B | 9320(30) | 4940(30) | 1409(16)  | 46(5) |
| H2A  | 5080(20) | 1280(20) | 9558(11)  | 22(3) |
| H2B  | 4340(20) | 3380(20) | 9644(11)  | 19(3) |
| H12  | 1420(20) | 1980(20) | 4408(12)  | 22(3) |
| H9   | 8010(20) | 3220(20) | 3313(13)  | 32(4) |
| H11  | 1750(20) | 2270(20) | 2603(12)  | 26(3) |
| H8   | 3230(20) | 2150(20) | 6333(11)  | 20(3) |
| H5   | 6150(40) | 3400(30) | 1657(18)  | 64(6) |

Table S.7 Fractional Atomic Coordinates ( $\times 10^4$ ) and Equivalent Isotropic Displacement Parameters ( $\text{\AA}^2\times 10^3$ ) for (2). Ueq is defined as 1/3 of the trace of the orthogonalised UIJ tensor.

| Atom | x          | y          | z         | U(eq)     |
|------|------------|------------|-----------|-----------|
| C2'  | 5148.1(12) | 3639.0(11) | 5129.7(8) | 22.66(14) |



|     |            |            |            |           |
|-----|------------|------------|------------|-----------|
| C1' | 5334.0(14) | 3513.3(12) | 6531.8(8)  | 25.53(15) |
| C3' | 7918.6(11) | 5167.9(9)  | 5860.2(7)  | 18.85(11) |
| C4' | 9852.1(16) | 6299.3(13) | 5815.6(11) | 30.73(18) |
| N1' | 6802.0(10) | 4692.8(8)  | 4719.6(6)  | 18.84(11) |
| N2' | 7072.8(12) | 4481.4(10) | 6985.3(6)  | 22.91(13) |

Table S.8 Anisotropic Displacement Parameters ( $\text{\AA}^2 \times 10^3$ ) for (2). The Anisotropic displacement factor exponent takes the form:  $-2\pi^2[h^2a^*2U_{11}+2hka^*b^*U_{12}+\dots]$ .

| Atom | U11     | U22     | U33       | U23       | U13       | U12       |
|------|---------|---------|-----------|-----------|-----------|-----------|
| C2'  | 24.5(2) | 23.9(3) | 19.5(2)   | -1.2(2)   | -0.92(19) | -5.1(2)   |
| C1'  | 28.4(3) | 30.0(4) | 18.2(2)   | 0.0(2)    | 4.2(2)    | -7.2(3)   |
| C3'  | 23.0(2) | 17.5(3) | 16.04(19) | -1.36(18) | -0.33(17) | -1.11(19) |
| C4'  | 31.1(3) | 30.3(4) | 30.9(4)   | 0.0(3)    | -1.6(3)   | -12.1(3)  |
| N1'  | 23.7(2) | 18.3(2) | 14.50(18) | 0.46(16)  | -0.41(14) | -0.16(18) |
| N2'  | 28.6(2) | 25.6(3) | 14.63(19) | -2.05(18) | 1.42(18)  | -3.6(2)   |

Table S.9 Bond Lengths for (2)

| Atom | Atom | Length/ $\text{\AA}$ | Atom | Atom | Length/ $\text{\AA}$ |
|------|------|----------------------|------|------|----------------------|
| C2'  | C1'  | 1.3666(11)           | C3'  | C4'  | 1.4852(11)           |
| C2'  | N1'  | 1.3732(10)           | C3'  | N1'  | 1.3499(9)            |
| C1'  | N2'  | 1.3822(10)           | C3'  | N2'  | 1.3266(9)            |

Table S.10 Bond Angles for (2).

| Atom | Atom | Atom | Angle/ $^\circ$ | Atom | Atom | Atom | Angle/ $^\circ$ |
|------|------|------|-----------------|------|------|------|-----------------|
| C1'  | C2'  | N1'  | 105.97(7)       | N2'  | C3'  | N1'  | 111.13(6)       |
| C2'  | C1'  | N2'  | 109.58(7)       | C3'  | N1'  | C2'  | 107.66(6)       |
| N1'  | C3'  | C4'  | 122.97(7)       | C3'  | N2'  | C1'  | 105.66(6)       |
| N2'  | C3'  | C4'  | 125.89(7)       |      |      |      |                 |

Table S.11 Torsion Angles for (2).

| A   | B   | C   | D   | Angle/°    | A   | B   | C   | D   | Angle/°  |
|-----|-----|-----|-----|------------|-----|-----|-----|-----|----------|
| C2' | C1' | N2' | C3' | -0.35(10)  | N1' | C2' | C1' | N2' | 0.26(10) |
| C1' | C2' | N1' | C3' | -0.08(9)   | N1' | C3' | N2' | C1' | 0.30(9)  |
| C4' | C3' | N1' | C2' | 179.19(8)  | N2' | C3' | N1' | C2' | -0.14(9) |
| C4' | C3' | N2' | C1' | -179.01(9) |     |     |     |     |          |

Table S.12 Hydrogen Atom Coordinates ( $\text{\AA}\times 10^4$ ) and Isotropic Displacement Parameters ( $\text{\AA}^2\times 10^3$ ) for (2).

| Atom | x         | y | z        | U(eq)            |
|------|-----------|---|----------|------------------|
| H4'B | 10210(60) |   | 7110(40) | 6630(30) 115(11) |
| H4'C | 9480(40)  |   | 7160(30) | 5030(30) 78(8)   |
| H4'A | 11300(50) |   | 5750(60) | 6200(50) 161(17) |
| H2'  | 4130(30)  |   | 3150(20) | 4357(17) 40(5)   |
| H1'  | 4530(30)  |   | 2720(20) | 7229(16) 38(4)   |
| H1'A | 7150(40)  |   | 5020(30) | 3777(16) 65(6)   |

Table S.13 Fractional Atomic Coordinates ( $\times 10^4$ ) and Equivalent Isotropic Displacement Parameters ( $\text{\AA}^2\times 10^3$ ) for (3). Ueq is defined as 1/3 of the trace of the orthogonalised UIJ tensor.

| Atom | x         | y | z          | U(eq)               |
|------|-----------|---|------------|---------------------|
| C1   | 7627.3(7) |   | 8009.4(6)  | 12883.5(5) 26.17(8) |
| C1'  | 2270.5(6) |   | 9157.7(4)  | 2010.7(4) 21.67(6)  |
| C2'  | 1364.0(6) |   | 10333.1(5) | 1186.0(3) 20.73(6)  |
| C2   | 8098.0(6) |   | 6488.2(5)  | 12755.1(4) 21.61(6) |
| C3'  | 1316.3(5) |   | 10802.4(4) | 3018.8(3) 16.01(5)  |
| C3   | 7954.3(5) |   | 5334.0(4)  | 11180.6(3) 15.24(5) |
| C4   | 7203.9(4) |   | 5485.9(4)  | 9971.7(3) 14.25(5)  |
| C4'  | 983.9(6)  |   | 11638.3(4) | 3978.6(4) 20.42(6)  |
| C5   | 7699.2(5) |   | 4283.2(4)  | 9391.8(3) 15.07(5)  |
| C6   | 5963.2(4) |   | 5753.4(3)  | 7635.8(3) 14.08(5)  |

|     |           |            |            |          |
|-----|-----------|------------|------------|----------|
| C7  | 5469.6(4) | 6912.1(4)  | 8188.1(3)  | 14.70(5) |
| C8  | 6123.6(4) | 6739.3(4)  | 9374.2(3)  | 15.00(5) |
| C9  | 5410.9(5) | 5816.0(4)  | 6478.4(3)  | 16.29(5) |
| C10 | 4316.8(5) | 7092.3(4)  | 5832.7(3)  | 16.60(5) |
| C11 | 3819.1(5) | 8286.7(4)  | 6361.0(3)  | 18.81(6) |
| C12 | 4379.5(5) | 8186.1(4)  | 7518.8(3)  | 18.09(6) |
| N1' | 763.4(4)  | 11359.3(3) | 1842.1(3)  | 17.52(5) |
| N2' | 2232.0(5) | 9458.3(4)  | 3159.0(3)  | 18.93(5) |
| O1  | 7359.2(4) | 6507.5(3)  | 11603.3(3) | 19.22(5) |
| O2  | 9009.4(4) | 4288.7(3)  | 11729.0(3) | 20.21(5) |
| O3  | 8630.4(5) | 3109.7(3)  | 9802.9(3)  | 21.10(5) |
| O4  | 7025.6(4) | 4490.3(3)  | 8241.3(2)  | 16.11(4) |
| O5  | 3766.6(5) | 7122.5(3)  | 4733.2(3)  | 22.08(6) |

Table S.14 Anisotropic Displacement Parameters ( $\text{\AA}^2 \times 10^3$ ) for (3). The Anisotropic displacement factor exponent takes the form:  $-2\pi^2[h^2a^*U_{11}+2hka^*b^*U_{12}+\dots]$ .

| Atom | $U_{11}$  | $U_{22}$  | $U_{33}$  | $U_{23}$   | $U_{13}$  | $U_{12}$  |
|------|-----------|-----------|-----------|------------|-----------|-----------|
| C1   | 32.92(19) | 23.89(18) | 25.61(16) | -13.04(14) | -4.32(14) | -3.56(14) |
| C1'  | 29.97(16) | 16.26(14) | 18.51(12) | -5.28(10)  | -8.39(11) | 1.25(11)  |
| C2'  | 28.17(15) | 18.78(14) | 15.37(11) | -3.49(10)  | -8.43(10) | -1.87(11) |
| C2   | 27.36(15) | 20.99(15) | 18.18(12) | -8.19(11)  | -8.46(11) | 0.10(12)  |
| C3'  | 19.59(11) | 13.39(11) | 14.2(1)   | -1.72(8)   | -6.22(8)  | -0.89(8)  |
| C3   | 17.68(10) | 13.37(11) | 14.43(10) | -3.53(8)   | -5.05(8)  | -0.26(8)  |
| C4   | 16.53(10) | 12.21(11) | 13.55(9)  | -3.00(8)   | -4.67(8)  | -0.12(8)  |
| C4'  | 27.06(15) | 17.02(14) | 17.34(12) | -5.04(10)  | -4.95(10) | -1.77(11) |
| C5   | 18.16(10) | 12.25(11) | 13.65(9)  | -2.47(8)   | -5.48(8)  | 0.98(8)   |
| C6   | 16.6(1)   | 10.96(10) | 13.46(9)  | -2.00(7)   | -4.85(7)  | 0.64(8)   |
| C7   | 17.67(10) | 11.26(11) | 14.3(1)   | -2.69(8)   | -5.42(8)  | 0.82(8)   |
| C8   | 17.71(10) | 12.11(11) | 14.8(1)   | -3.45(8)   | -4.94(8)  | 0.18(8)   |

| Atom | U <sub>11</sub> | U <sub>22</sub> | U <sub>33</sub> | U <sub>23</sub> | U <sub>13</sub> | U <sub>12</sub> |
|------|-----------------|-----------------|-----------------|-----------------|-----------------|-----------------|
| C9   | 20.59(12)       | 13.17(11)       | 14.21(10)       | -3.00(8)        | -6.47(8)        | 1.10(9)         |
| C10  | 20.48(12)       | 13.87(12)       | 14.3(1)         | -2.24(8)        | -6.53(8)        | 0.48(9)         |
| C11  | 23.98(13)       | 13.06(12)       | 17.63(11)       | -2.62(9)        | -8.67(10)       | 2.76(10)        |
| C12  | 23.24(13)       | 12.26(12)       | 17.70(11)       | -3.85(9)        | -7.92(10)       | 2.76(9)         |
| N1'  | 21.53(11)       | 14.19(11)       | 15.36(9)        | -0.78(8)        | -7.92(8)        | -0.44(8)        |
| N2'  | 25.38(12)       | 14.05(11)       | 15.89(10)       | -2.18(8)        | -8.75(9)        | 1.50(9)         |
| O1   | 23.82(11)       | 16.85(11)       | 17.81(10)       | -7.43(8)        | -8.77(8)        | 2.79(8)         |
| O2   | 25.40(11)       | 15.43(11)       | 18.69(10)       | -3.88(8)        | -10.67(8)       | 3.27(8)         |
| O3   | 28.67(12)       | 13.69(10)       | 18.82(10)       | -3.98(8)        | -11.13(9)       | 5.97(9)         |
| O4   | 20.89(10)       | 11.84(9)        | 14.49(8)        | -3.28(6)        | -7.55(7)        | 2.88(7)         |
| O5   | 31.69(14)       | 16.93(11)       | 16.54(9)        | -3.85(8)        | -12.44(9)       | 3.59(9)         |

Table S.15 Bond Lengths for (3).

| Atom | Atom | Length/Å  | Atom | Atom | Length/Å  |
|------|------|-----------|------|------|-----------|
| C1   | C2   | 1.5028(6) | C4   | C8   | 1.3650(4) |
| C1'  | C2'  | 1.3640(5) | C5   | O3   | 1.2103(4) |
| C1'  | N2'  | 1.3850(5) | C5   | O4   | 1.3833(4) |
| C2'  | N1'  | 1.3742(5) | C6   | C7   | 1.4025(5) |
| C2   | O1   | 1.4562(4) | C6   | C9   | 1.3849(4) |
| C3'  | C4'  | 1.4886(5) | C6   | O4   | 1.3675(4) |
| C3'  | N1'  | 1.3492(4) | C7   | C8   | 1.4207(4) |
| C3'  | N2'  | 1.3272(5) | C7   | C12  | 1.4074(4) |
| C3   | C4   | 1.4828(4) | C9   | C10  | 1.4011(5) |
| C3   | O1   | 1.3346(4) | C10  | C11  | 1.4169(5) |
| C3   | O2   | 1.2151(4) | C10  | O5   | 1.3323(4) |
| C4   | C5   | 1.4601(5) | C11  | C12  | 1.3777(5) |

Table S.16 Bond Angles for(3).

| Atom | Atom | Atom | Angle/°   | Atom | Atom | Atom | Angle/°   |
|------|------|------|-----------|------|------|------|-----------|
| C2'  | C1'  | N2'  | 109.42(3) | O4   | C6   | C7   | 120.29(3) |
| C1'  | C2'  | N1'  | 105.75(3) | O4   | C6   | C9   | 116.98(3) |
| O1   | C2   | C1   | 106.85(3) | C6   | C7   | C8   | 118.21(3) |
| N1'  | C3'  | C4'  | 123.23(3) | C6   | C7   | C12  | 117.73(3) |
| N2'  | C3'  | C4'  | 126.34(3) | C12  | C7   | C8   | 124.05(3) |
| N2'  | C3'  | N1'  | 110.39(3) | C4   | C8   | C7   | 121.55(3) |
| O1   | C3   | C4   | 111.93(3) | C6   | C9   | C10  | 118.54(3) |
| O2   | C3   | C4   | 125.19(3) | C9   | C10  | C11  | 119.90(3) |
| O2   | C3   | O1   | 122.87(3) | O5   | C10  | C9   | 117.71(3) |
| C5   | C4   | C3   | 118.81(3) | O5   | C10  | C11  | 122.39(3) |
| C8   | C4   | C3   | 121.38(3) | C12  | C11  | C10  | 120.15(3) |
| C8   | C4   | C5   | 119.77(3) | C11  | C12  | C7   | 120.95(3) |
| O3   | C5   | C4   | 127.59(3) | C3'  | N1'  | C2'  | 108.30(3) |
| O3   | C5   | O4   | 115.47(3) | C3'  | N2'  | C1'  | 106.14(3) |
| O4   | C5   | C4   | 116.93(3) | C3   | O1   | C2   | 115.88(3) |
| C9   | C6   | C7   | 122.74(3) | C6   | O4   | C5   | 123.24(3) |

Table S.17 Torsion Angles for (3).

| A   | B   | C   | D   | Angle/°    | A   | B   | C   | D   | Angle/°    |
|-----|-----|-----|-----|------------|-----|-----|-----|-----|------------|
| C1  | C2  | O1  | C3  | 166.50(4)  | C9  | C6  | C7  | C8  | -179.44(3) |
| C1' | C2' | N1' | C3' | 0.44(5)    | C9  | C6  | C7  | C12 | -0.52(5)   |
| C2' | C1' | N2' | C3' | -0.21(5)   | C9  | C6  | O4  | C5  | 178.93(3)  |
| C3  | C4  | C5  | O3  | 2.83(6)    | C9  | C10 | C11 | C12 | -1.24(6)   |
| C3  | C4  | C5  | O4  | -177.62(3) | C10 | C11 | C12 | C7  | 0.85(6)    |
| C3  | C4  | C8  | C7  | 177.12(3)  | C12 | C7  | C8  | C4  | -178.86(3) |
| C4  | C3  | O1  | C2  | -176.99(3) | N1' | C3' | N2' | C1' | 0.49(5)    |

|     |     |     |     |            |     |     |     |     |            |
|-----|-----|-----|-----|------------|-----|-----|-----|-----|------------|
| A   | B   | C   | D   | Angle/°    | A   | B   | C   | D   | Angle/°    |
| C4  | C5  | O4  | C6  | 0.94(5)    | N2' | C1' | C2' | N1' | -0.14(5)   |
| C4' | C3' | N1' | C2' | 177.05(4)  | N2' | C3' | N1' | C2' | -0.60(5)   |
| C4' | C3' | N2' | C1' | -177.06(4) | O1  | C3  | C4  | C5  | -178.99(3) |
| C5  | C4  | C8  | C7  | -0.39(5)   | O1  | C3  | C4  | C8  | 3.48(5)    |
| C6  | C7  | C8  | C4  | -0.02(5)   | O2  | C3  | C4  | C5  | 2.15(6)    |
| C6  | C7  | C12 | C11 | 0.02(6)    | O2  | C3  | C4  | C8  | -175.38(4) |
| C6  | C9  | C10 | C11 | 0.74(6)    | O2  | C3  | O1  | C2  | 1.90(6)    |
| C6  | C9  | C10 | O5  | -178.62(3) | O3  | C5  | O4  | C6  | -179.46(3) |
| C7  | C6  | C9  | C10 | 0.14(6)    | O4  | C6  | C7  | C8  | 0.88(5)    |
| C7  | C6  | O4  | C5  | -1.37(5)   | O4  | C6  | C7  | C12 | 179.79(3)  |
| C8  | C4  | C5  | O3  | -179.60(4) | O4  | C6  | C9  | C10 | 179.83(3)  |
| C8  | C4  | C5  | O4  | -0.05(5)   | O5  | C10 | C11 | C12 | 178.09(4)  |
| C8  | C7  | C12 | C11 | 178.87(4)  |     |     |     |     |            |

Table S.18 Hydrogen Atom Coordinates ( $\text{\AA}\times 10^4$ ) and Isotropic Displacement Parameters ( $\text{\AA}^2\times 10^3$ ) for(3).

| Atom | x        | y | z        | U(eq)     |       |
|------|----------|---|----------|-----------|-------|
| H1A  | 8237(15) |   | 8705(11) | 12172(10) | 41(3) |
| H1B  | 8092(14) |   | 8029(12) | 13668(9)  | 38(2) |
| H1C  | 6279(13) |   | 8366(12) | 12949(10) | 40(3) |
| H2A  | 9449(12) |   | 6118(10) | 12693(9)  | 30(2) |
| H2B  | 7547(12) |   | 5787(10) | 13455(8)  | 27(2) |
| H5   | 3205(18) |   | 8103(12) | 4263(12)  | 59(3) |
| H8   | 5774(13) |   | 7593(11) | 9737(9)   | 29(2) |
| H9   | 5848(12) |   | 4927(9)  | 6159(8)   | 26(2) |
| H11  | 3063(12) |   | 9175(10) | 5874(9)   | 28(2) |
| H12  | 4033(14) |   | 9042(11) | 7895(10)  | 36(2) |

|      |          |           |          |       |
|------|----------|-----------|----------|-------|
| H1'  | 2917(13) | 8192(10)  | 1905(10) | 36(2) |
| H2'  | 1118(15) | 10561(12) | 288(9)   | 41(3) |
| H1'A | 45(14)   | 12253(10) | 1558(10) | 38(3) |
| H4'A | 470(13)  | 11128(10) | 4781(8)  | 30(2) |
| H4'B | 119(14)  | 12567(11) | 3707(10) | 39(3) |
| H4'C | 2128(14) | 11878(12) | 4130(10) | 40(3) |

Optimised Cartesian coordinates of (1)

1.a

| atom | X                 | y                 | Z                 |
|------|-------------------|-------------------|-------------------|
| O    | 4.35518799686038  | 0.68074139856511  | 6.40956147961230  |
| O    | 1.61825080984055  | -1.20063843007194 | 9.79773588871354  |
| O    | 3.73560588681723  | -0.80995686121660 | 10.38758832685085 |
| O    | 2.61313942729582  | 1.55082725354477  | 2.09226185365889  |
| O    | 5.31746772647657  | 0.33616084331304  | 8.34939038627477  |
| C    | 2.06171107611146  | 0.17811766413193  | 5.95587663650362  |
| C    | 1.94376390365480  | -0.28886577875222 | 7.29715833996193  |
| C    | 2.85956831276412  | -0.77521058534919 | 9.55625062332631  |
| C    | 3.53926051894917  | 1.12994612246327  | 4.25448095046401  |
| C    | 3.00139479777498  | -0.27172844289806 | 8.16117987939856  |
| C    | 1.20360991258223  | 0.64129578072710  | 3.73535254342598  |
| C    | 3.31480359238787  | 0.66054657444936  | 5.54362384257820  |
| C    | 4.30010107006975  | 0.24587380258452  | 7.71405833309338  |
| C    | 1.00584568875271  | 0.18057999508517  | 5.01672705350783  |
| C    | 2.47828757922852  | 1.12054159375979  | 3.33984435969722  |
| C    | 1.34492832054697  | -1.71337820047932 | 11.10807808949898 |
| C    | -0.10728305780649 | -2.12359315620519 | 11.15100218262856 |
| H    | -0.76357859475659 | -1.26357671753685 | 10.95336352467854 |
| H    | -0.35004961846888 | -2.52211030045607 | 12.14636688308125 |
| H    | -0.31754831238703 | -2.90419263145693 | 10.40536391561466 |
| H    | 2.01782372927858  | -2.56262708347773 | 11.30384375164637 |

|   |                  |                   |                   |
|---|------------------|-------------------|-------------------|
| H | 1.57239253293675 | -0.93178486614169 | 11.84952469298097 |
| H | 0.02511227516126 | -0.19016445376686 | 5.32653818155505  |
| H | 4.52499230433266 | 1.49477271230238  | 3.96146545428050  |
| H | 0.39485191868440 | 0.64729225693402  | 3.00217522735308  |
| H | 0.98017069906348 | -0.67185004303671 | 7.64137331950539  |
| H | 3.54155041899086 | 1.85653432243216  | 1.91759385229770  |
| O | 5.13131192752868 | 2.29202235990326  | 1.70361332783885  |
| H | 5.55801944085961 | 1.76278106104780  | 1.01618734236756  |
| H | 5.23667471646939 | 3.20507580960169  | 1.40437675760453  |

1.b

| atom | X                 | y                 | Z                 |
|------|-------------------|-------------------|-------------------|
| O    | 4.35157971326302  | 0.77664382715093  | 6.45055833442822  |
| O    | 1.60972081818931  | -1.06495840332273 | 9.84860322104277  |
| O    | 3.72635264807711  | -0.68606767857385 | 10.43820485854189 |
| O    | 2.68734138006330  | 1.35770375982767  | 2.04930393308888  |
| O    | 5.26823150051984  | 0.60752625695909  | 8.42584837684016  |
| C    | 2.10176652783707  | 0.13761848575633  | 5.95758973326543  |
| C    | 1.97113152972786  | -0.27971980048820 | 7.31416584551047  |
| C    | 2.84921607148433  | -0.65137144367861 | 9.60580076416049  |
| C    | 3.57883467016695  | 1.08420035175122  | 4.25438494096524  |
| C    | 3.00247889710028  | -0.17097585871085 | 8.20313616142723  |
| C    | 1.28599727258283  | 0.45346728809701  | 3.69724246027630  |
| C    | 3.34015867049742  | 0.66289576706217  | 5.55873541927525  |
| C    | 4.27589953378044  | 0.40940703469920  | 7.76746783718303  |
| C    | 1.07386069526744  | 0.04197251014014  | 4.99309548459926  |
| C    | 2.54546734067515  | 0.97740803943299  | 3.32182931734623  |
| C    | 1.33185903549892  | -1.58594105733375 | 11.15750619569772 |
| C    | -0.10786682277312 | -2.03845807256977 | 11.17848619867984 |
| H    | -0.78726221757853 | -1.19869077390733 | 10.97226272905275 |
| H    | -0.35191190774997 | -2.44495470627966 | 12.17024958711069 |



|   |                   |                   |                   |
|---|-------------------|-------------------|-------------------|
| H | -0.28290601449536 | -2.82467725979631 | 10.42958216104999 |
| H | 2.02735445294021  | -2.41437981662310 | 11.36169666650400 |
| H | 1.52656920866873  | -0.79584048396867 | 11.89915980625060 |
| H | 0.10517177994782  | -0.36498959340633 | 5.29403854120297  |
| H | 4.55581672902451  | 1.48668262648300  | 3.97756047322672  |
| H | 0.50210706464088  | 0.38333990214471  | 2.94091729222323  |
| H | 1.02150999615797  | -0.70349865569591 | 7.64887688261218  |
| H | 3.57591025637427  | 1.70467990922052  | 1.89012810065377  |
| O | 5.88386293456958  | 1.02290704311494  | 11.18469598828404 |
| H | 5.20208030091285  | 0.42739696147211  | 11.51761029560539 |
| H | 5.74715993462864  | 0.91572984104306  | 10.23009639389450 |

1.c

| atom | X                 | y                 | Z                 |
|------|-------------------|-------------------|-------------------|
| O    | 4.49123439048453  | 0.99383033897605  | 5.77332328389629  |
| O    | 1.64358564707545  | -0.58862935147024 | 9.21559794428205  |
| O    | 3.78463159498243  | -0.32883889366807 | 9.79620254838314  |
| O    | 2.88636832832899  | 1.51943829947616  | 1.34444078266424  |
| O    | 5.36741161323233  | 0.86255867231912  | 7.77923691741786  |
| C    | 2.24672956342000  | 0.34573698686075  | 5.26132240021587  |
| C    | 2.08776646230907  | -0.02801753808242 | 6.63182694171357  |
| C    | 2.91523238716386  | -0.28336984609277 | 8.95894778730107  |
| C    | 3.74879470133136  | 1.25803309824580  | 3.56264248751371  |
| C    | 3.10124274588029  | 0.10786310412924  | 7.53244866266772  |
| C    | 1.45498846734643  | 0.65524174943347  | 2.99036216422572  |
| C    | 3.49286339260047  | 0.85963667586219  | 4.87078547912217  |
| C    | 4.39354601949406  | 0.65886923487611  | 7.10488710543654  |
| C    | 1.22804858504941  | 0.25492945448873  | 4.28997452183516  |
| C    | 2.72438686884076  | 1.15139697010255  | 2.62177609311668  |
| C    | 1.32627376520822  | -1.02719660718729 | 10.54334221651070 |
| C    | -0.16412179720170 | -1.25913595835558 | 10.60615354132938 |
| H    | -0.71399751378966 | -0.32988286561972 | 10.39517749665049 |

|   |                   |                   |                   |
|---|-------------------|-------------------|-------------------|
| H | -0.44399311127807 | -1.60440530091030 | 11.61149607907420 |
| H | -0.47440013823384 | -2.02299321890382 | 9.87831340882378  |
| H | 1.89543015855731  | -1.94528041187891 | 10.75745580182823 |
| H | 1.65304841553346  | -0.25427469964362 | 11.25458118314527 |
| H | 0.24853838854145  | -0.12857703997273 | 4.58692318098112  |
| H | 4.72850011554080  | 1.65826242264459  | 3.29284969161954  |
| H | 0.67167679289728  | 0.60043653887255  | 2.23253250364555  |
| H | 1.12603736353293  | -0.42546436074361 | 6.96431272354612  |
| H | 3.79194626951211  | 1.81875090756911  | 1.18537206311521  |
| O | -0.28204716757750 | 2.83396030043813  | 6.30817835217143  |
| O | 2.56551916182505  | 4.41645493417663  | 2.86584924721938  |
| O | 0.42448435666198  | 4.15654077370280  | 2.28525933930319  |
| O | 1.32292157412980  | 2.30836837231044  | 10.73702506621908 |
| O | -1.15824520630523 | 2.96515756121840  | 4.30226925740277  |
| C | 1.96246447011210  | 3.48207105687752  | 6.82013004735114  |
| C | 2.12139756661578  | 3.85581798255623  | 5.44962061389202  |
| C | 1.29388997160498  | 4.11113193484770  | 3.12251085592039  |
| C | 0.46043923955999  | 2.56977576546950  | 8.51884544395324  |
| C | 1.10790885717956  | 3.71991171134337  | 4.54901695633963  |
| C | 2.75425966036607  | 3.17256750374718  | 9.09107010078717  |
| C | 0.71634083556906  | 2.96816749170776  | 7.21069557056237  |
| C | -0.18437772631612 | 3.16888642883746  | 4.97660465851615  |
| C | 2.98116846488250  | 3.57288257812226  | 7.79145312687393  |
| C | 1.48486999483280  | 2.67641342668166  | 9.45968658294409  |
| C | 2.88280297124186  | 4.85500505703906  | 1.53809256301815  |
| C | 4.37318296531273  | 5.08704073537038  | 1.47527542591092  |
| H | 4.92311876949699  | 4.15783150575585  | 1.68628760404762  |
| H | 4.65303317001977  | 5.43229068747090  | 0.46992033735747  |
| H | 4.68340969099074  | 5.85094561894698  | 2.20308772069263  |
| H | 2.31358622003242  | 5.77304492125763  | 1.32395115893126  |
| H | 2.55608099547003  | 4.08204038495334  | 0.82687600986444  |

|   |                   |                  |                   |
|---|-------------------|------------------|-------------------|
| H | 3.96067082723044  | 3.95639083074891 | 7.49448089166003  |
| H | -0.51925693355761 | 2.16954040190716 | 8.78866253345994  |
| H | 3.53758948263793  | 3.22736997536942 | 9.84888124152305  |
| H | 3.08311462444070  | 4.25327702010783 | 5.11711488291574  |
| H | 0.41734268718302  | 2.00907367770781 | 10.89612040110020 |

Optimised Cartesian coordinates of (2)

2.

| atom | X                | y                | Z                |
|------|------------------|------------------|------------------|
| C    | 3.16815035624237 | 2.90169646431372 | 4.96573897085681 |
| C    | 3.17003148805310 | 2.94437220749536 | 6.33496802119502 |
| C    | 4.75940171303602 | 4.24178032058318 | 5.71792358401945 |
| C    | 5.91268725021165 | 5.18950570627317 | 5.70308777966245 |
| N    | 4.19179083733755 | 3.73712061280932 | 4.58353260703127 |
| N    | 4.15946450478901 | 3.77783678012166 | 6.78717375007567 |
| H    | 6.15436918698149 | 5.45083582883504 | 6.73995244846457 |
| H    | 5.67490733028564 | 6.11466505391724 | 5.15517806451751 |
| H    | 6.80495468667300 | 4.73901657775712 | 5.24057128545958 |
| H    | 2.55027094650257 | 2.36729035737294 | 4.24858256074211 |
| H    | 2.50807060570228 | 2.41533561284928 | 7.01953575925712 |
| H    | 4.47088409418529 | 3.94303147767194 | 3.63426216871841 |

2.a.

| atom | X                | y                | Z                |
|------|------------------|------------------|------------------|
| C    | 3.44329208044931 | 2.62413258725491 | 4.94417933591898 |
| C    | 3.56017855124174 | 2.53433489431498 | 6.30555922651943 |
| C    | 4.63675259415717 | 4.31550861448862 | 5.72434942736761 |
| C    | 5.47339571887272 | 5.55012615331393 | 5.73936404813692 |
| N    | 4.13243020383143 | 3.76011186962476 | 4.59682211126085 |
| N    | 4.30398518246589 | 3.59089823820696 | 6.77652018548568 |
| H    | 5.46516509838350 | 5.98703286743700 | 6.74601110440423 |

|   |                  |                  |                   |
|---|------------------|------------------|-------------------|
| H | 5.09558011312484 | 6.29493761372100 | 5.02515540793120  |
| H | 6.51647765847138 | 5.32113591375458 | 5.47175483747061  |
| H | 2.94004374430854 | 2.00111077319468 | 4.20889771188832  |
| H | 3.14968813231823 | 1.77680730067057 | 6.97238339865289  |
| H | 4.24456591362802 | 4.12608264898394 | 3.65714914758543  |
| C | 6.20599326816064 | 4.76506536268334 | 9.90211541454981  |
| C | 6.06564430346149 | 4.89059355743832 | 11.26253759575984 |
| C | 4.23749968139608 | 4.02587207479039 | 10.54363993102878 |
| C | 2.86708798871974 | 3.43786116004476 | 10.44536254078320 |
| N | 5.03193702343947 | 4.21257254373321 | 9.46131647238802  |
| N | 4.83282038516410 | 4.42567634456708 | 11.65365205170629 |
| H | 2.42234626840764 | 3.38651416150456 | 11.44701361612436 |
| H | 2.89550963761004 | 2.42203796204209 | 10.02200427066268 |
| H | 2.21466201475907 | 4.04808261040311 | 9.80214270103473  |
| H | 7.01951764542894 | 5.01558703421715 | 9.22400800724344  |
| H | 6.78668419356195 | 5.28895210970430 | 11.97752622253753 |
| H | 4.78274259863797 | 3.97856560390560 | 8.47415123355891  |

Optimised Cartesian coordinates of (3)

3.a.

| atom | X                | y                 | Z                 |
|------|------------------|-------------------|-------------------|
| C    | 9.92882592658703 | 11.68862238812035 | 13.06416213569308 |
| C    | 9.65253926521807 | 10.20747726756436 | 13.15804170694177 |
| C    | 8.57970268774137 | 8.53490506831273  | 11.88154775419459 |
| C    | 7.79755153908871 | 8.27705083245152  | 10.64052887841786 |
| C    | 7.32669096799723 | 6.91661315258674  | 10.35541365428580 |
| C    | 6.35352686914929 | 7.75150130838971  | 8.30270052873554  |
| C    | 6.78843630584244 | 9.06303113171182  | 8.56388688478444  |
| C    | 7.51843696319461 | 9.28883098875457  | 9.76489734427827  |
| C    | 5.64652891691889 | 7.42524316253044  | 7.15403414146723  |
| C    | 5.35806046674321 | 8.43018536582641  | 6.21813695751295  |
| C    | 5.78407027231553 | 9.76406184226431  | 6.46737257859129  |

|   |                   |                   |                   |
|---|-------------------|-------------------|-------------------|
| C | 6.48291126887530  | 10.06372209453466 | 7.61517128657033  |
| O | 8.88376858782487  | 9.82807475049671  | 12.00886602853143 |
| O | 8.91863891938402  | 7.70340185066582  | 12.69031674244037 |
| O | 7.47790945327614  | 5.92594206956104  | 11.02145025610923 |
| O | 6.62478909372312  | 6.75803186111601  | 9.18224387818952  |
| O | 4.69056352644604  | 8.09670667621598  | 5.12880585395711  |
| H | 10.50444323939618 | 11.92406231803397 | 12.15702081572534 |
| H | 10.51414780113373 | 12.01034771473640 | 13.93735118805728 |
| H | 8.99148576022824  | 12.26349940567634 | 13.04517737599886 |
| H | 10.58165150988004 | 9.61708373626207  | 13.17424413773868 |
| H | 9.08151952611321  | 9.95313484579728  | 14.06464153970071 |
| H | 4.60357887685915  | 8.86918100572985  | 4.46718138903003  |
| H | 7.86800127499190  | 10.29944316914448 | 9.98854489716863  |
| H | 5.32735718663935  | 6.39766047275743  | 6.97402916982252  |
| H | 5.55394011634982  | 10.54170873110264 | 5.73706548772038  |
| H | 6.81098017211789  | 11.08888191273484 | 7.80644821580930  |
| C | 5.24780372034225  | 10.34722722290077 | 2.30869826791832  |
| C | 4.77216193955430  | 11.46210113379438 | 1.67498523280452  |
| C | 3.48307882884363  | 10.96799994854676 | 3.40491598367845  |
| C | 2.37862264126931  | 11.05083683558105 | 4.40173042202506  |
| N | 3.65677474752759  | 11.83724818432558 | 2.38427653220770  |
| N | 4.43597172567402  | 10.05223638954015 | 3.38020776833378  |
| H | 6.11858129731014  | 9.74198648973256  | 2.06176746883436  |
| H | 5.11788600913412  | 12.01118371812522 | 0.80271347379743  |
| H | 3.06106431846451  | 12.63300034316200 | 2.17958764041233  |
| H | 2.49253051048354  | 10.23964266146180 | 5.13130383944275  |
| H | 1.39721293872679  | 10.95402553628015 | 3.91455048148653  |
| H | 2.40013382863434  | 12.01260741347083 | 4.93465006158603  |

3.b

| atom | X                | y                | Z                 |
|------|------------------|------------------|-------------------|
| O    | 8.68088864978792 | 9.60325221060707 | 12.24958044144739 |

|   |                   |                   |                   |
|---|-------------------|-------------------|-------------------|
| O | 9.24716453396237  | 7.45723259608543  | 12.53973619477711 |
| O | 8.43786977878665  | 5.79423800489137  | 10.42268971507283 |
| O | 7.38330713158354  | 6.70984214633266  | 8.73369920212791  |
| O | 5.03184524081408  | 8.26024731980923  | 5.01318964732329  |
| C | 9.10038082709629  | 11.41412550373006 | 13.73080970141170 |
| C | 9.25923344627404  | 9.92745066667328  | 13.51654343065035 |
| C | 8.72824237867760  | 8.32615531938594  | 11.85096376930891 |
| C | 8.09772311401174  | 8.15958824077987  | 10.54233601437016 |
| C | 8.01867633494403  | 6.83325757833158  | 9.96680842355756  |
| C | 6.83051986348444  | 7.75066157003260  | 8.07289497245081  |
| C | 6.91729392795093  | 9.09372156566581  | 8.61567231648485  |
| C | 7.56144328267355  | 9.28712977609016  | 9.84269495631494  |
| C | 6.20043592192074  | 7.48962718131718  | 6.88183009059096  |
| C | 5.62487530697244  | 8.55514867474497  | 6.15656463215442  |
| C | 5.69224652961428  | 9.89264794296695  | 6.65352182242348  |
| C | 6.31774734423244  | 10.14992862851039 | 7.84412707236754  |
| H | 9.61262106576510  | 11.98135261276528 | 12.93982730180270 |
| H | 9.53764485091530  | 11.69811280743686 | 14.69862999692860 |
| H | 8.03804376203597  | 11.69930418374873 | 13.73452969516138 |
| H | 10.31828142609345 | 9.62424397932640  | 13.51403212729587 |
| H | 8.75023972072052  | 9.34454230115906  | 14.30086474025081 |
| H | 4.67215145554054  | 9.05169528518971  | 4.58270830405234  |
| H | 7.64323262014547  | 10.28381815655407 | 10.27196767657513 |
| H | 6.14588832064123  | 6.47162789334240  | 6.49349894223483  |
| H | 5.23718774698637  | 10.69796699290648 | 6.07022621934220  |
| H | 6.37186705202591  | 11.16938377352668 | 8.23238725561546  |
| N | 10.10338328710193 | 4.75999847116249  | 12.67895544053108 |
| N | 11.24377689846828 | 3.34886967098074  | 13.93840225139407 |
| C | 10.78096704340913 | 2.69265736518543  | 12.82288448237503 |
| C | 10.06875435934945 | 3.55538341634178  | 12.02666951914813 |
| C | 10.81768270347983 | 4.59430015433925  | 13.81957421761748 |

|   |                   |                  |                   |
|---|-------------------|------------------|-------------------|
| C | 11.08645813346711 | 5.71231871000088 | 14.77554982825306 |
| H | 10.98133879402292 | 1.63446183564066 | 12.65071401392611 |
| H | 9.54897571842348  | 3.42870259239763 | 11.08028999236462 |
| H | 9.66563620397679  | 5.63669524298075 | 12.37030211614228 |
| H | 10.92174645731741 | 5.38048626027941 | 15.81010910225715 |
| H | 10.43195367248531 | 6.56717639289107 | 14.56218735665555 |
| H | 12.13027309484122 | 6.05418297588952 | 14.69633701724159 |

3.c

| atom | X                | y                | Z                 |
|------|------------------|------------------|-------------------|
| O    | 2.44832642657282 | 2.80260568639715 | -1.39296735378576 |
| O    | 1.10914098939816 | 4.55622612434007 | -1.03243897054777 |
| O    | 2.54557371528815 | 6.54734989577873 | 0.46543950059191  |
| O    | 3.83522191556958 | 5.73720765313951 | 2.04823472031677  |
| O    | 6.59288168344921 | 4.39842408160195 | 5.59415809430350  |
| C    | 2.11855608049580 | 1.02469782078067 | -2.94173684859510 |
| C    | 1.56697360195345 | 2.32956653292459 | -2.42067136186412 |
| C    | 2.08572920430760 | 3.90626905535400 | -0.74302442973278 |
| C    | 3.00226589715310 | 4.19741280827256 | 0.39418579471422  |
| C    | 3.06966484653258 | 5.56489671699120 | 0.92017207945593  |
| C    | 4.52361656250874 | 4.74650106605915 | 2.66573534899518  |
| C    | 4.51438292633451 | 3.44293183376187 | 2.14445730910783  |
| C    | 3.72579309476038 | 3.20217563895567 | 0.97677840969600  |
| C    | 5.22316892362289 | 5.07129532632184 | 3.82235186591530  |
| C    | 5.92973281824149 | 4.06343381569413 | 4.48135663739644  |
| C    | 5.93307723039022 | 2.74255666506794 | 3.98043728770800  |
| C    | 5.23283776627683 | 2.44391493076806 | 2.83029981656161  |
| H    | 2.18219252851539 | 0.27683630501604 | -2.13760586919510 |
| H    | 1.45721792897838 | 0.63286260458367 | -3.72760078071007 |
| H    | 3.12160718699763 | 1.16415274882694 | -3.37047117329974 |
| H    | 0.56011462989267 | 2.20930391119429 | -1.99128675995994 |
| H    | 1.50157636216412 | 3.09402822082397 | -3.21023223894496 |

|   |                   |                   |                   |
|---|-------------------|-------------------|-------------------|
| H | 7.04126012567013  | 3.62689458526414  | 5.96612377417123  |
| H | 3.67752085436820  | 2.19017790082000  | 0.56665093716799  |
| H | 5.21572980047733  | 6.09110205972959  | 4.20909014276821  |
| H | 6.48815040038832  | 1.96775890593309  | 4.51577825118322  |
| H | 5.21545954571515  | 1.42231588427978  | 2.44418321306139  |
| N | 0.54884761895358  | 1.86626404271255  | 1.50230734751436  |
| N | 2.09530928587171  | 0.82599409892837  | 2.67700492113314  |
| C | 1.79568688314812  | 0.08094828979233  | 1.56013763074966  |
| C | 0.83218354941007  | 0.71194115117242  | 0.81609594071374  |
| C | 1.32945501972459  | 1.89708674208674  | 2.61575261181558  |
| C | 1.28916541786929  | 3.00942982767321  | 3.60920670197771  |
| H | 2.28816332433676  | -0.86875787704786 | 1.35076719706916  |
| H | 0.33281635347295  | 0.45034789555049  | -0.11374688924589 |
| H | -0.12253983139094 | 2.57459427381593  | 1.22526797563035  |
| H | 0.34258718153550  | 3.01097709581673  | 4.17123636698783  |
| H | 1.38523425530722  | 3.98814588333192  | 3.11489186827636  |
| H | 2.11724289573804  | 2.88799979748634  | 4.31897693089848  |

#### Topological Parameters

Table S.19: List of bond critical points (BCP's) found from topological analysis of theoretical model ground states of 1.a

| Bond        | $\rho$ (eÅ <sup>-3</sup> ) | $\nabla^2\rho$ (eÅ <sup>-5</sup> ) | $\epsilon$ |
|-------------|----------------------------|------------------------------------|------------|
| C(4)-C(5)   | 1.85682                    | -16.435                            | 0.165215   |
| C(11)-C(12) | 2.12917                    | -19.2932                           | 0.266391   |
| C(11)-C(10) | 2.021203                   | -18.5279                           | 0.204374   |
| C(11)-H(11) | 1.866848                   | -25.0545                           | 0.021981   |
| C(12)-H(12) | 1.880777                   | -25.7418                           | 0.005705   |
| C(1)-C(2)   | 1.725436                   | -14.9468                           | 0.036424   |
| C(2)-H(2A)  | 1.892593                   | -25.7225                           | 0.043144   |
| C(2)-H(2B)  | 1.892681                   | -25.7288                           | 0.043086   |
| C(1)-H(1A)  | 1.82849                    | -23.459                            | 0.006627   |
| C(1)-H(1B)  | 1.825454                   | -23.4548                           | 0.004796   |
| C(1)-H(1C)  | 1.828247                   | -23.4555                           | 0.00665    |
| C(7)-C(6)   | 2.063083                   | -18.8722                           | 0.235536   |
| C(7)-C(12)  | 1.997024                   | -17.6288                           | 0.179774   |
| C(7)-C(8)   | 1.966926                   | -17.6196                           | 0.1242     |
| C(8)-C(4)   | 2.175052                   | -19.8026                           | 0.278237   |



|              |          |          |          |
|--------------|----------|----------|----------|
| C(8)-H(8)    | 1.908782 | -27.2464 | 0.008534 |
| C(3)-C(4)    | 1.794911 | -15.8067 | 0.141477 |
| C(9)-C(6)    | 2.098006 | -19.3395 | 0.279905 |
| C(9)-C(10)   | 2.062854 | -18.6446 | 0.254967 |
| C(9)-H(9)    | 1.864331 | -25.2338 | 0.026394 |
| H(9)-O(1')   | 0.068617 | 0.854929 | 0.357906 |
| H(5)-O(1')   | 0.329468 | 3.843443 | 0.047085 |
| O(4)-C(6)    | 1.914829 | -3.73006 | 0.048263 |
| O(4)-C(5)    | 1.850315 | -8.94448 | 0.047386 |
| O(1)-C(2)    | 1.585192 | -5.73833 | 0.023746 |
| O(1)-C(3)    | 2.090198 | -8.94839 | 0.007923 |
| O(1)-H(8)    | 0.111847 | 1.955906 | 5.09087  |
| O(1')-H(1'B) | 2.339779 | -60.1309 | 0.018791 |
| O(1')-H(1'A) | 2.341216 | -60.1988 | 0.018778 |
| O(2)-C(3)    | 2.7987   | 6.086028 | 0.093869 |
| O(2)-O(3)    | 0.088471 | 1.04155  | 0.33246  |
| O(5)-C(10)   | 2.113372 | -7.40406 | 0.032795 |
| O(5)-H(5)    | 2.138469 | -54.4971 | 0.013778 |
| O(3)-C(5)    | 2.839271 | 6.249924 | 0.120695 |

Table S.20: List of ring critical points (RCP's) found from topological analysis of the theoretical ground state of 1.a

| Atoms                            | $\rho$ (eÅ <sup>-3</sup> ) | $\nabla^2\rho$ (eÅ <sup>-5</sup> ) |
|----------------------------------|----------------------------|------------------------------------|
| O(1)-H(8)-C(8)C(4)-C(3)          | 0.016568                   | 0.087026                           |
| O(2)-O(3)-C(3)-C(4)-(C5)         | 0.012567                   | 0.059555                           |
| O(4)-C(6)-C(7)-C(8)-C(4)C(5)     | 0.020533                   | 0.156759                           |
| C(10)-C(11)-C(12)-C(7)-C(6)-C(9) | 0.02006                    | 0.16721                            |
| O(5)-H(5)-O(1')-H(9)-C(9)-C(1)   | 0.008434                   | 0.0422                             |

Table S.21: Atomic charges (e) from the theoretical ground state of 1.a

| Name  | $\Omega$ |
|-------|----------|
| C(4)  | -0.02735 |
| C(11) | 0.003962 |
| C(6)  | 0.526327 |
| C(5)  | 1.593385 |
| C(12) | 0.021828 |
| C(10) | 0.647268 |
| C(2)  | 0.537192 |
| C(1)  | 0.141688 |
| C(7)  | 0.00264  |
| C(8)  | 0.028735 |

|        |          |
|--------|----------|
| C(3)   | 1.685323 |
| C(9)   | -0.00411 |
| H(1C)  | -0.02394 |
| H(1B)  | -0.01606 |
| H(1A)  | -0.02387 |
| H(2A)  | 0.003001 |
| H(2B)  | 0.003288 |
| H(12)  | 0.038525 |
| H(9)   | 0.061309 |
| H(11)  | 0.029052 |
| H(8)   | 0.090709 |
| H(5)   | 0.688649 |
| H(1'B) | 0.66604  |
| H(1'A) | 0.666194 |
| O(4)   | -1.15491 |
| O(1)   | -1.15669 |
| O(1')  | -1.27116 |
| O(2)   | -1.24925 |
| O(5)   | -1.26306 |
| O(3)   | -1.24432 |
| -----  | 0.000405 |

Table S.22: List of bond critical points (BCP's) found from topological analysis of the theoretical first excited state of 1.a

| Bond        | $\rho$ (eÅ <sup>-3</sup> ) | $\nabla^2\rho$ (eÅ <sup>-5</sup> ) | $\epsilon$ |
|-------------|----------------------------|------------------------------------|------------|
| C(4)-C(5)   | 1.914309                   | -17.1965                           | 0.196022   |
| C(11)-C(12) | 2.160941                   | -19.8395                           | 0.275228   |
| C(11)-C(10) | 1.97277                    | -17.8022                           | 0.191316   |
| C(11)-H(11) | 1.86589                    | -25.0767                           | 0.022612   |
| C(12)-H(12) | 1.886681                   | -25.9964                           | 0.004149   |
| C(1)-C(2)   | 1.721651                   | -14.8906                           | 0.03743    |
| C(2)-H(2A)  | 1.886904                   | -25.5011                           | 0.04305    |
| C(2)-H(2B)  | 1.887262                   | -25.5143                           | 0.043077   |
| C(1)-H(1A)  | 1.826635                   | -23.392                            | 0.006207   |
| C(1)-H(1B)  | 1.824934                   | -23.4286                           | 0.004865   |
| C(1)-H(1C)  | 1.826979                   | -23.4053                           | 0.006225   |
| C(7)-C(6)   | 1.902371                   | -16.318                            | 0.209995   |
| C(7)-C(12)  | 1.907939                   | -16.2587                           | 0.167277   |
| C(7)-C(8)   | 2.05977                    | -18.9852                           | 0.15703    |
| C(8)-C(4)   | 1.92624                    | -15.686                            | 0.250417   |
| C(8)-H(8)   | 1.928467                   | -28.0288                           | 0.009311   |
| C(3)-C(4)   | 1.865532                   | -16.7865                           | 0.165166   |

|              |          |          |          |
|--------------|----------|----------|----------|
| C(9)-C(6)    | 2.164173 | -20.5657 | 0.291826 |
| C(9)-C(10)   | 2.001916 | -17.6895 | 0.239895 |
| C(9)-H(9)    | 1.863447 | -25.2049 | 0.027546 |
| H(9)-O(1')   | 0.068023 | 0.861773 | 0.392346 |
| H(5)-O(1')   | 0.38807  | 4.150317 | 0.044609 |
| O(4)-C(6)    | 1.941377 | -5.05638 | 0.047087 |
| O(4)-C(5)    | 1.763504 | -10.2096 | 0.04643  |
| O(1)-C(2)    | 1.616336 | -5.79793 | 0.021018 |
| O(1)-C(3)    | 2.030941 | -10.3305 | 0.013194 |
| O(1')-H(1'B) | 2.333091 | -60.5222 | 0.018397 |
| O(1')-H(1'A) | 2.334218 | -60.5254 | 0.091803 |
| O(2)-C(3)    | 2.746481 | 3.410774 | 0.493532 |
| O(2)-O(3)    | 0.087216 | 1.033236 | 0.035267 |
| O(5)-C(10)   | 2.184681 | -5.49334 | 0.012579 |
| O(5)-H(5)    | 2.048385 | -49.7136 | 0.120392 |
| O(3)-C(5)    | 2.809915 | 4.592578 | 0        |

Table S.23: List of ring critical points (RCP's) found from topological analysis of the theoretical excited state of 1.a

| Atoms                            | $\rho$ (eÅ <sup>-3</sup> ) | $\nabla^2\rho$ (eÅ <sup>-5</sup> ) |
|----------------------------------|----------------------------|------------------------------------|
| O(2)-O(3)-C(3)-C(4)-(C5)         | 0.012581                   | 0.057528                           |
| O(4)-C(6)-C(7)-C(8)-C(4)C(5)     | 0.01942                    | 0.14568                            |
| C(10)-C(11)-C(12)-C(7)-C(6)-C(9) | 0.019077                   | 0.157373                           |
| O(5)--H(5)-O(1')-H(9)-C(9)-C(1)  | 0.00856                    | 0.043258                           |

Table S.24: Atomic charges (e) from the theoretical excited state of 1.a

| Name  | $\Omega$ |
|-------|----------|
| C(4)  | -0.03748 |
| C(11) | 0.004904 |
| C(6)  | 0.540574 |
| C(5)  | 1.535624 |
| C(12) | 0.020991 |
| C(10) | 0.685492 |
| C(2)  | 0.552793 |
| C(1)  | 0.141322 |
| C(7)  | -0.00646 |
| C(8)  | -0.67402 |
| C(3)  | 1.640861 |
| C(9)  | -0.00067 |
| H(1C) | -0.0257  |

|        |          |
|--------|----------|
| H(1B)  | -0.01805 |
| H(1A)  | -0.02555 |
| H(2A)  | -0.00242 |
| H(2B)  | -0.00234 |
| H(12)  | 0.044286 |
| H(9)   | 0.062191 |
| H(11)  | 0.033353 |
| H(8)   | 0.104482 |
| H(5)   | 0.690926 |
| H(1'B) | 0.670116 |
| H(1'A) | 0.670288 |
| O(4)   | -1.1314  |
| O(1)   | -1.15194 |
| O(1')  | -1.26945 |
| O(2)   | -1.24334 |
| O(5)   | -1.26977 |
| O(3)   | -1.24401 |
| ----   | -0.70439 |

Table S.25: List of bond critical points (BCP's) found from topological analysis of the theoretical ground state of 3.a

| Bond        | $\rho$ (eÅ <sup>-3</sup> ) | $\nabla^2\rho$ (eÅ <sup>-5</sup> ) | $\epsilon$ |
|-------------|----------------------------|------------------------------------|------------|
| C(1)-C(2)   | 1.72549                    | -14.94633339                       | 0.036137   |
| C(1)-H(1A)  | 1.827991                   | -23.44334914                       | 0.006709   |
| C(1)-H(1B)  | 1.825359                   | -23.44949433                       | 0.004728   |
| C(1)-H(1C)  | 1.828382                   | -23.4559528                        | 0.006661   |
| C(10)-C(11) | 1.998393                   | -18.01960362                       | 0.200359   |
| C(10)-O(5)  | 2.148429                   | -7.557476303                       | 0.030613   |
| C(11)-C(12) | 2.124965                   | -19.21374676                       | 0.264565   |
| C(11)-H(11) | 1.871322                   | -25.21145311                       | 0.022932   |
| C(12)-C(12) | 1.88077                    | -25.7147322                        | 0.005538   |
| C(2)-H(2A)  | 1.893578                   | -25.75878478                       | 0.042684   |
| C(2)-H(2B)  | 1.891729                   | -25.68916338                       | 0.043413   |
| C(2)-O(1)   | 1.584842                   | -5.800409573                       | 0.024088   |
| C(1')-C(2') | 2.177589                   | -19.58556696                       | 0.394534   |
| C(1')-H(1') | 1.885541                   | -25.98430124                       | 0.042539   |
| C(1')-N(2') | 2.118089                   | -22.35008352                       | 0.144236   |
| C(2')-H(2') | 1.888875                   | -26.43747895                       | 0.042099   |
| C(2')-N(1') | 2.036501                   | -14.54745025                       | 0.149919   |
| C(3)-C(4)   | 1.7957                     | -15.80451532                       | 0.143287   |
| C(3)-O(1)   | 2.08897                    | -8.969544784                       | 0.008429   |
| C(3)-O(2)   | 2.797363                   | 6.006622902                        | 0.093513   |

|              |          |              |          |
|--------------|----------|--------------|----------|
| C(3')-C(4')  | 1.753226 | -15.25491837 | 0.050699 |
| C(3')-N(1')  | 2.175375 | -17.63464958 | 0.198231 |
| C(3')-N(2')  | 2.411473 | -26.1222186  | 0.271184 |
| C(4')-H(4'A) | 1.84277  | -24.21282344 | 0.007494 |
| C(4')-H(4'B) | 1.824333 | -23.62208985 | 0.010255 |
| C(4')-H(4'C) | 1.825528 | -23.64985165 | 0.010101 |
| C(4)-C(5)    | 1.856564 | -16.41660044 | 0.16728  |
| C(4)-C(8)    | 2.170557 | -19.731943   | 0.277119 |
| C(5)-O(3)    | 2.836679 | 6.133695811  | 0.120301 |
| C(5)-O(4)    | 1.850423 | -8.984606527 | 0.047296 |
| C(6)-C(7)    | 2.057104 | -18.799344   | 0.232204 |
| C(6)-C(9)    | 2.10744  | -19.49037675 | 0.289022 |
| C(6)-O(4)    | 1.911785 | -3.739529423 | 0.049952 |
| C(7)-C(12)   | 1.999527 | -17.66183301 | 0.181263 |
| C(7)-C(8)    | 1.972223 | -17.68229288 | 0.12747  |
| C(8)-H(8)    | 1.908721 | -27.2297507  | 0.008675 |
| C(9)-C(10)   | 2.064426 | -18.85648223 | 0.251596 |
| C(9)-H(9)    | 1.857954 | -24.84994719 | 0.027085 |
| H(5)-N(2')   | 0.442097 | 2.985695237  | 0.026359 |
| H(11)-N(2')  | 0.058238 | 0.68953862   | 0.751683 |
| N(1')-H(1'A) | 2.220441 | -39.82534372 | 0.027102 |
| O(1)-H(8)    | 0.111921 | 1.950941479  | 4.635021 |
| O(2)-O(3)    | 0.087162 | 1.026632466  | 0.362979 |
| O(5)-H(5)    | 1.936592 | -42.82190751 | 0.013597 |

Table S.26: List of ring critical points (RCP's) found from topological analysis of the theoretical ground state of 3.a

| Atoms                           | $\rho$ (eÅ <sup>-3</sup> ) | $\nabla^2\rho$ (eÅ <sup>-5</sup> ) |
|---------------------------------|----------------------------|------------------------------------|
| O(2)-O(3)-C(5)-C(4)-C(3)        | 0.012433                   | 0.058344                           |
| C(3)-C(4)-C(8)-H(8)-O(1)        | 0.016577                   | 0.087325                           |
| C(1')-C(2')-N(1')-C(3')-N(2')   | 0.055187                   | 0.456508                           |
| C(4)-C(5)-O(4)-C(6)-C(7)-C(8)   | 0.020513                   | 0.156593                           |
| C(6)-C(7)-C(12)-C(11)-C(10)-C() | 0.019991                   | 0.166468                           |
| C(10)-C(11)-N(2)-H(5)-O(5)      | 0.008257                   | 0.035847                           |

Table S.27: Atomic charges (e) from the theoretical ground state of 3.a

| Name  | $\Omega$ |
|-------|----------|
| C(1)  | 0.141529 |
| C(10) | 0.673946 |
| C(11) | -0.01192 |

|        |          |
|--------|----------|
| C(12)  | 0.02172  |
| C(2)   | 0.536939 |
| C(1')  | 0.467916 |
| C(2')  | 0.421911 |
| C(3)   | 1.683047 |
| C(3')  | 1.136017 |
| C(4')  | 0.12856  |
| C(4)   | -0.02872 |
| C(5)   | 1.591856 |
| C(6)   | 0.521508 |
| C(7)   | 0.000976 |
| C(8)   | 0.027906 |
| C(9)   | 0.006187 |
| H(1A)  | -0.02418 |
| H(1B)  | -0.01618 |
| H(1C)  | -0.02397 |
| H(2B)  | 0.004028 |
| H(2A)  | 0.002017 |
| H(5)   | 0.677542 |
| H(8)   | 0.089442 |
| H(9)   | 0.042461 |
| H(11)  | 0.030105 |
| H(12)  | 0.036187 |
| H(1')  | 0.039431 |
| H(2')  | 0.075278 |
| H(1'A) | 0.544476 |
| H(4'A) | 0.013456 |
| H(4'B) | 0.008429 |
| H(4'C) | 0.007927 |
| N(1')  | -1.39832 |
| N(2')  | -1.33979 |
| O(1)   | -1.15654 |
| O(2)   | -1.25034 |
| O(3)   | -1.2456  |
| O(4)   | -1.15554 |
| O(5)   | -1.28002 |
| ----   | -0.00033 |

Table S.28: List of bond critical points (BCP's) found from topological analysis of the theoretical first excited state of 3.a

| Bond       | $\rho$ (eÅ <sup>-3</sup> ) | $\nabla^2\rho$ (eÅ <sup>-5</sup> ) | $\epsilon$ |
|------------|----------------------------|------------------------------------|------------|
| C(1)-C(2)  | 1.719781361                | -14.86169844                       | 0.036991   |
| C(1)-H(1A) | 1.82637818                 | -23.38086098                       | 0.006385   |
| C(1)-H(1B) | 1.824616862                | -23.41375582                       | 0.004853   |

|              |             |              |          |
|--------------|-------------|--------------|----------|
| C(1)-H(1C)   | 1.826857312 | -23.39529615 | 0.006418 |
| C(10)-C(11)  | 1.94473736  | -17.26555254 | 0.182277 |
| C(10)-O(5)   | 2.26313091  | -5.258427832 | 0.027359 |
| C(11)-C(12)  | 2.154914489 | -19.69430069 | 0.27753  |
| C(11)-H(11)  | 1.866699526 | -25.05247341 | 0.023778 |
| C(12)-C(12)  | 1.884609628 | -25.87800149 | 0.004031 |
| C(2)-H(2A)   | 1.88521023  | -25.42716136 | 0.043501 |
| C(2)-H(2B)   | 1.889104024 | -25.565633   | 0.042415 |
| C(2)-O(1)    | 1.618718182 | -5.940399432 | 0.023299 |
| C(1')-C(2')  | 2.184573455 | -19.70287986 | 0.396789 |
| C(1')-H(1')  | 1.888969057 | -26.22584339 | 0.041528 |
| C(1')-N(2')  | 2.102419132 | -21.52812206 | 0.142988 |
| C(2')-H(2')  | 1.891621156 | -26.60730311 | 0.041255 |
| C(2')-N(1')  | 2.034625283 | -14.55518596 | 0.146741 |
| C(3)-C(4)    | 1.86290021  | -16.70679805 | 0.169952 |
| C(3)-O(1)    | 2.026743219 | -10.40783275 | 0.014286 |
| C(3)-O(2)    | 2.742715371 | 3.238612017  | 0.090652 |
| C(3')-C(4')  | 1.752389352 | -15.24903826 | 0.04912  |
| C(3')-N(1')  | 2.192981889 | -17.95260899 | 0.200002 |
| C(3')-N(2')  | 2.39236167  | -25.52483375 | 0.265656 |
| C(4')-H(4'A) | 1.845739174 | -24.33163046 | 0.008011 |
| C(4')-H(4'B) | 1.827228471 | -23.75183772 | 0.010668 |
| C(4')-H(4'C) | 1.825811319 | -23.70961664 | 0.010754 |
| C(4)-C(5)    | 1.905219066 | -17.02263676 | 0.199037 |
| C(4)-C(8)    | 1.927394119 | -15.7294958  | 0.24897  |
| C(5)-O(3)    | 2.802195263 | 4.276329925  | 0.118862 |
| C(5)-O(4)    | 1.78016553  | -10.13667318 | 0.046431 |
| C(6)-C(7)    | 1.914518282 | -16.55837361 | 0.207283 |
| C(6)-C(9)    | 2.175766868 | -20.72580111 | 0.308153 |
| C(6)-O(4)    | 1.918202877 | -5.364968573 | 0.05074  |
| C(7)-C(12)   | 1.903808662 | -16.20245861 | 0.167406 |
| C(7)-C(8)    | 2.048817047 | -18.71914324 | 0.1642   |
| C(8)-H(8)    | 1.926192915 | -27.91803619 | 0.009323 |
| C(9)-C(10)   | 1.983412111 | -17.60850239 | 0.228549 |
| C(9)-H(9)    | 1.855436543 | -24.72952555 | 0.029335 |
| H(5)-N(2')   | 0.691556649 | 0.088346157  | 0.024351 |
| H(11)-N(2')  | 0.05260333  | 0.728289471  | 5.206854 |
| N(1')-H(1'A) | 2.217086969 | -39.92352218 | 0.026546 |
| O(2)-O(3)    | 1.568179845 | -21.52850764 | 0.012779 |
| O(5)-H(5)    | 1.568179845 | -21.52850764 | 0.012779 |

Table S.29: List of ring critical points (RCP's) found from topological analysis of the theoretical excited state of 3.a

| Atoms | $\rho$ (eÅ <sup>-3</sup> ) | $\nabla^2\rho$ (eÅ <sup>-3</sup> ) |
|-------|----------------------------|------------------------------------|
|-------|----------------------------|------------------------------------|

|                                 |          |          |
|---------------------------------|----------|----------|
|                                 |          | 5)       |
| O(2)-O(3)-C(5)-C(4)-C(3)        | 0.012466 | 0.056619 |
| C(1')-C(2')-N(1')-C(3')-N(2')   | 0.054928 | 0.457592 |
| C(4)-C(5)-O(4)-C(6)-C(7)-C(8)   | 0.019405 | 0.145464 |
| C(6)-C(7)-C(12)-C(11)-C(10)-C() | 0.018972 | 0.156254 |
| C(10)-C(11)-N(2)-H(5)-O(5)      | 0.00779  | 0.032429 |

Table S.30: Atomic charges (e) from the theoretical excited state of 3.a

| Name   | $\Omega$ |
|--------|----------|
| C(1)   | 0.140727 |
| C(10)  | 0.744104 |
| C(11)  | -0.01527 |
| C(12)  | 0.018387 |
| C(2)   | 0.553484 |
| C(1')  | 0.466074 |
| C(2')  | 0.427931 |
| C(3)   | 1.633472 |
| C(3')  | 1.140035 |
| C(4')  | 0.129444 |
| C(4)   | -0.04033 |
| C(5)   | 1.539047 |
| C(6)   | 0.523994 |
| C(7)   | -0.00923 |
| C(8)   | 0.028522 |
| C(9)   | 0.003147 |
| H(1A)  | -0.02619 |
| H(1B)  | -0.01831 |
| H(1C)  | -0.02601 |
| H(2B)  | -0.00475 |
| H(2A)  | -0.00155 |
| H(5)   | 0.658854 |
| H(8)   | 0.100683 |
| H(9)   | 0.039275 |
| H(11)  | 0.02854  |
| H(12)  | 0.03902  |
| H(1')  | 0.05223  |
| H(2')  | 0.082537 |
| H(1'A) | 0.548877 |
| H(4'A) | 0.018646 |
| H(4'B) | 0.01365  |
| H(4'C) | 0.013572 |
| N(1')  | -1.39687 |
| N(2')  | -1.34738 |
| O(1)   | -1.15182 |



|       |          |
|-------|----------|
| O(2)  | -1.24567 |
| O(3)  | -1.24694 |
| O(4)  | -1.13406 |
| O(5)  | -1.28047 |
| ----- | -0.0006  |

Optimised Cartesian coordinates of the excitoplex states of (3).

### 3.a-excitoplex

| atom | X                 | y                 | Z                 |
|------|-------------------|-------------------|-------------------|
| C    | 9.98676332546737  | 11.58695376685175 | 13.14680593427348 |
| C    | 9.70153872829219  | 10.10480322414775 | 13.19084258281470 |
| C    | 8.61703660489450  | 8.47885944429647  | 11.86396039299769 |
| C    | 7.82504794629202  | 8.26463547203611  | 10.63047040977618 |
| C    | 7.38345421087111  | 6.91710217128968  | 10.28241519776672 |
| C    | 6.35711621214456  | 7.82891322047340  | 8.28051858063369  |
| C    | 6.76409185894697  | 9.14141144611965  | 8.61558170178095  |
| C    | 7.50085408732063  | 9.31789052616399  | 9.80381862108702  |
| C    | 5.64678176760991  | 7.54433251916397  | 7.13177480036592  |
| C    | 5.29671188104346  | 8.58666010065836  | 6.22285597558928  |
| C    | 5.70470933461262  | 9.92938195616786  | 6.57341163605475  |
| C    | 6.40869376134550  | 10.18555499391583 | 7.71981447842594  |
| O    | 8.92810735183303  | 9.77010675777479  | 12.03394762650052 |
| O    | 8.96722540045185  | 7.62551758589281  | 12.64798345859208 |
| O    | 7.56077400621308  | 5.89180634070262  | 10.89300529272189 |
| O    | 6.67264881581080  | 6.80008041793791  | 9.10771381300543  |
| O    | 4.65159057268031  | 8.33140938126124  | 5.15135572029487  |
| H    | 10.56023450090091 | 11.84927243049854 | 12.24558413978632 |
| H    | 10.57702152642254 | 11.87687148176433 | 14.02782917555010 |
| H    | 9.05269691763227  | 12.16758012154291 | 13.14951938220062 |
| H    | 10.62833038697782 | 9.51014283471977  | 13.18616398660721 |
| H    | 9.13414230185201  | 9.82368547711632  | 14.09214661240386 |

|   |                  |                   |                   |
|---|------------------|-------------------|-------------------|
| H | 7.82940411393871 | 10.32344219650890 | 10.07781382793088 |
| H | 5.35811066631311 | 6.51625152998596  | 6.90488744220604  |
| H | 5.43914521921291 | 10.74623559096549 | 5.89765327497428  |
| H | 6.70881289971792 | 11.20839161167250 | 7.96624110650631  |
| C | 5.28658607377667 | 10.36746848241809 | 2.27028085050895  |
| C | 4.77997837867971 | 11.44478088673833 | 1.60762767072669  |
| C | 3.47710001474415 | 11.01199319780438 | 3.35215007433040  |
| C | 2.39508118201845 | 11.09632658409716 | 4.36566566328956  |
| N | 3.65324069169587 | 11.82522939421259 | 2.30195271363282  |
| N | 4.46063347656706 | 10.12040536211734 | 3.34288304802706  |
| H | 6.16265172358702 | 9.75849311359194  | 2.06283365443458  |
| H | 5.11492102247831 | 11.96690592926822 | 0.71556876518512  |
| H | 3.04445032324045 | 12.60316909135573 | 2.06255475286766  |
| H | 2.43471492618899 | 10.20849053053198 | 5.00805651958876  |
| H | 1.41232734223167 | 11.15047197684864 | 3.87806647067697  |
| H | 2.52445980117714 | 11.99366411759689 | 4.98790166397925  |
| H | 4.57224364481599 | 9.33710473378909  | 4.12389898190493  |

### 3.c-excitoplex

| atom | X                | y                | Z                 |
|------|------------------|------------------|-------------------|
| O    | 2.45108101793189 | 2.65883294454623 | -1.46497550642096 |
| O    | 1.45295603411407 | 4.65072834423945 | -1.61053992789009 |
| O    | 2.11753994558804 | 6.42528216247906 | 0.52723159713051  |
| O    | 3.47221545291717 | 5.64288337443785 | 2.06324463898752  |
| O    | 6.24747338774125 | 4.27861501109985 | 5.62102883295593  |
| C    | 2.16033204074441 | 0.80158215243145 | -2.91522952258335 |
| C    | 1.75850207080193 | 2.23124756324068 | -2.63886971204664 |
| C    | 2.20772340647030 | 3.90440873682817 | -1.02395201032978 |
| C    | 2.94307813858013 | 4.19198494374006 | 0.22011880979546  |
| C    | 2.78083707308452 | 5.47709403459094 | 0.87804119843965  |
| C    | 4.26371702388375 | 4.70457919217325 | 2.64958132371750  |

|   |                  |                   |                   |
|---|------------------|-------------------|-------------------|
| C | 4.43564580888566 | 3.44743733674319  | 2.00236632719789  |
| C | 3.76832735774455 | 3.23506360776911  | 0.79602442743862  |
| C | 4.85491124581043 | 5.00514642768564  | 3.85092283212782  |
| C | 5.69062028985377 | 4.03818329745838  | 4.53401952729399  |
| C | 5.84117828137171 | 2.74347286787634  | 3.86103070448723  |
| C | 5.25176236352850 | 2.47599287590851  | 2.66236031507709  |
| H | 1.89379940694633 | 0.14946615506894  | -2.07028372520527 |
| H | 1.64312671948648 | 0.43375349038451  | -3.81291750075707 |
| H | 3.24444703556649 | 0.72495603473515  | -3.08497746407047 |
| H | 0.67398664634125 | 2.32556174684483  | -2.46933728952524 |
| H | 2.01952047102508 | 2.89789385870756  | -3.47594028230347 |
| H | 3.87986860374586 | 2.27143673501639  | 0.29200722121749  |
| H | 4.69570688749043 | 5.98270943913257  | 4.31168096122503  |
| H | 6.46018743705281 | 1.99592558863113  | 4.36541819330526  |
| H | 5.38318999871604 | 1.50150219236524  | 2.18112193828557  |
| N | 0.65398035034318 | 2.22855434385867  | 1.85480535633501  |
| N | 2.05784586628143 | 0.82538084985465  | 2.64717352707453  |
| C | 1.61505095496400 | 0.30036281723081  | 1.45142850889710  |
| C | 0.72179846844519 | 1.19309946928883  | 0.94825987334094  |
| C | 1.47245236061263 | 2.00037012562200  | 2.88294855297633  |
| C | 1.66869607425816 | 2.86599184925133  | 4.06874387887008  |
| H | 1.97618710756954 | -0.64863170270026 | 1.06562591355404  |
| H | 0.14095208317566 | 1.18828681961112  | 0.03047037934231  |
| H | 0.08075609523295 | 3.06324792506625  | 1.75566381147605  |
| H | 0.97259326049758 | 2.57050445297125  | 4.86772793933183  |
| H | 1.47661111785808 | 3.91286354274639  | 3.80263716279047  |
| H | 2.69713769831388 | 2.76861599008334  | 4.44029947970957  |
| H | 2.74405743702474 | 0.39725489298106  | 3.26479672875145  |

### Melting Point Testing of Crystals

The melting points of (1), (2) and (3) were obtained using a Stanford Research Systems, OptiMelt. The crystals were placed in a glass capillary tube and the melting point range was set from 50°C to 250°C using a 6°C/min gradient.

1. Blessing, R. H., Data reduction and error analysis for accurate single crystal diffraction intensities. *Crystallogr. Rev.* **1987**, *1* (1), 3-58.
2. Sheldrick, G. M., A short history of SHELX. *Acta Crystallogr., Sect. A: Found. Crystallogr.* **2008**, *64* (1), 112-122.
3. Farrugia, L. J., WinGX and ORTEP for Windows: an update. *J. Appl. Crystallogr.* **2012**, *45* (4), 849-854.
4. Meindl, K.; Henn, J., Foundations of residual-density analysis. *Acta Crystallogr., Sect. A: Found. Crystallogr.* **2008**, *64* (3), 404-418.
